# Supplementary material for: Optimizing photovoltaic performance of squaraine derivative dyes: a DFT study on different anchoring groups
Source: Royal Society of Chemistry journal article supplement (doi:10.1039/d4ra05322b), 2024-01-01
Supplement: d4ra05322b1.pdf [file d4ra05322b1.pdf]

# Optimizing photovoltaic performance of squaraine derivatives dyes: A DFT study on different anchoring groups

Giuseppe Consiglio<sup>\*a</sup>, Adam Gorczyński<sup>b</sup>, Guido Spoto<sup>c</sup>, Salvatore Petralia<sup>d</sup> and Giuseppe Forte<sup>\*d</sup>

<sup>a</sup> Department of Chemical Science University of Catania, Via S. Sofia 64, 95125, Italy,

<sup>b</sup> Faculty of Chemistry, Adam Mickiewicz University, Uniwersytetu Poznańskiego 8, 61-614 Poznań, Poland

<sup>c</sup> InfoBiotech S.r.l, Via del Bersagliere 45, 90143 Palermo, Italy

<sup>d</sup> Department of Drug Science and Health University of Catania, Via S. Sofia 64, 95125, Italy.

Email [gforte@unict.it](mailto:gforte@unict.it)

Email [giuseppe.consiglio@unict.it](mailto:giuseppe.consiglio@unict.it)

Electronic Supplementary Information:

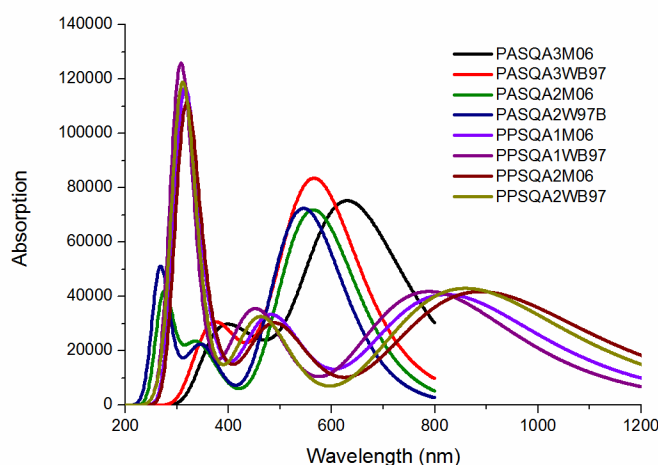

Figure S1: absorption spectra of dyes in acetonitrile at TD-M062X/6-311+G(2d,p)/SMD level and TD-wB97X-D/6-311+G(2d,p)/SMD level for most of the investigated dyes. The spectra are Gaussian broadened with 0.35 eV (half width half maximum).

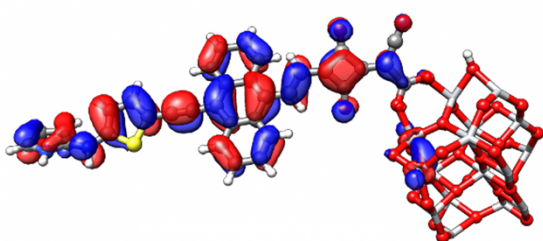

PASQA1@TiO<sub>2</sub> - H

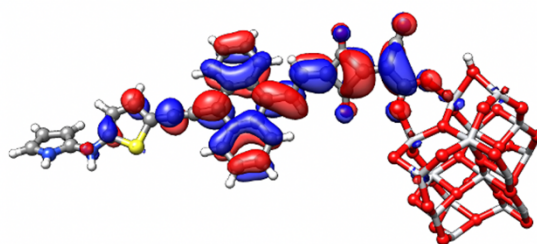

PASQA1@TiO<sub>2</sub> - L

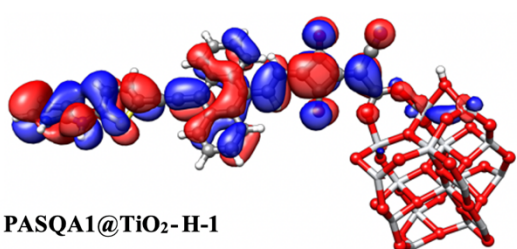

PASQA1@TiO<sub>2</sub> - H-1

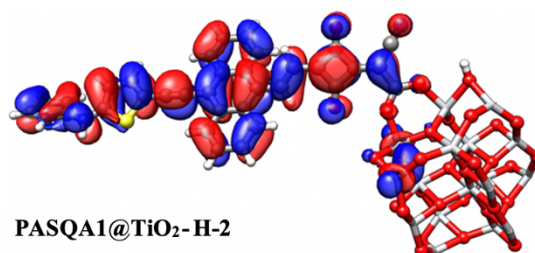

PASQA1@TiO<sub>2</sub> - H-2

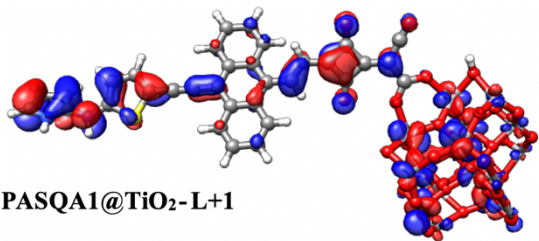

PASQA1@TiO<sub>2</sub>-L+1

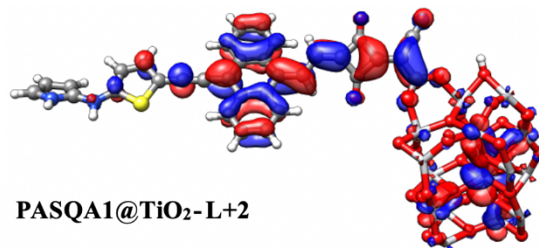

PASQA1@TiO<sub>2</sub>-L+2

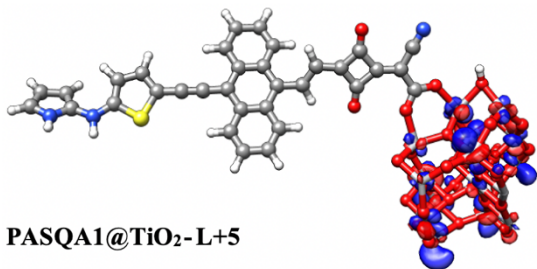

PASQA1@TiO<sub>2</sub>-L+5

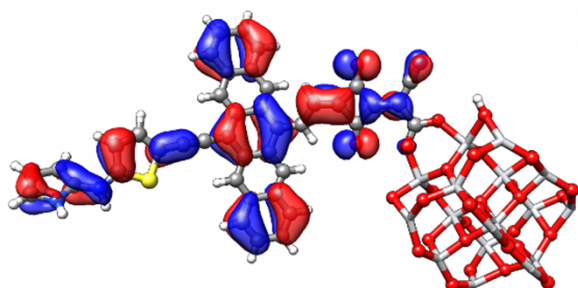

PPSQA1@TiO<sub>2</sub> - H

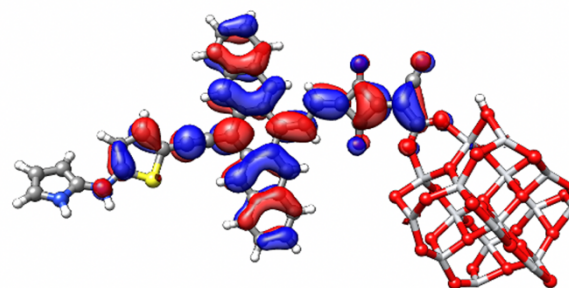

PPSQA1@TiO<sub>2</sub> - L

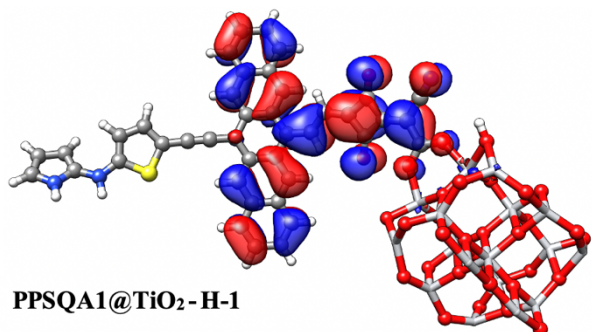

PPSQA1@TiO<sub>2</sub>-H-1

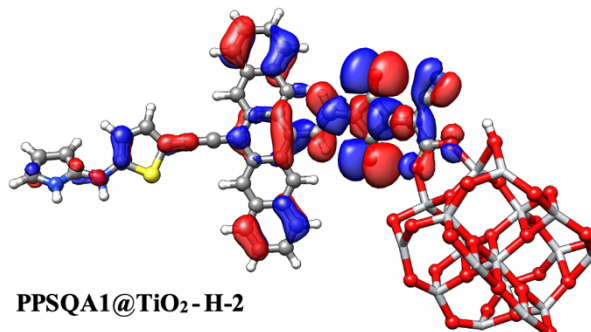

PPSQA1@TiO<sub>2</sub>-H-2

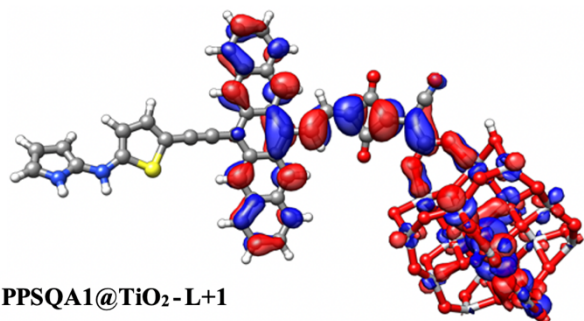

PPSQA1@TiO<sub>2</sub>-L+1

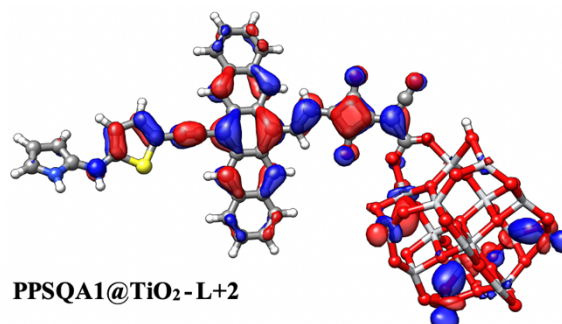

PPSQA1@TiO<sub>2</sub>-L+2

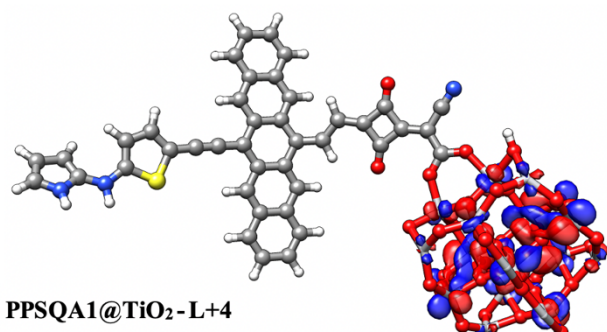

PPSQA1@TiO<sub>2</sub>-L+4

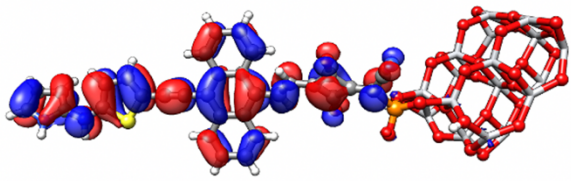

PASQA2@TiO<sub>2</sub> - H

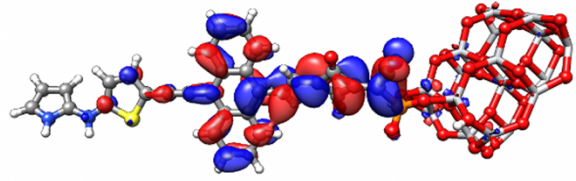

PASQA2@TiO<sub>2</sub> - L

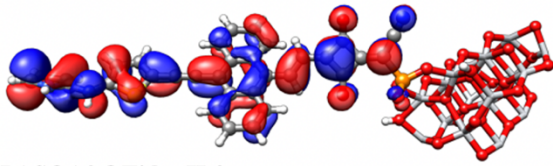

PASQA2@TiO<sub>2</sub> - H-2

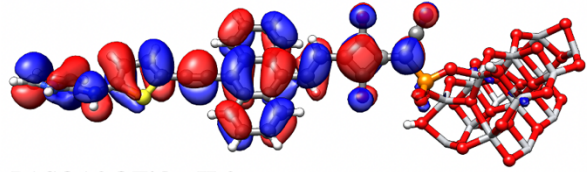

PASQA2@TiO<sub>2</sub> - H-3

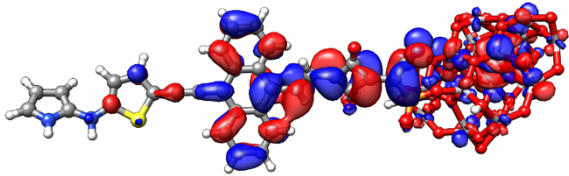

PASQA2@TiO<sub>2</sub> - L+1

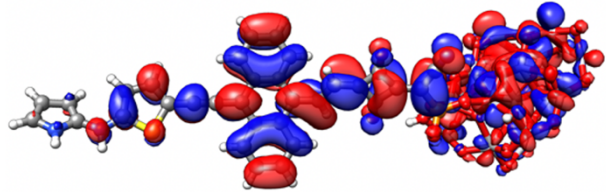

PASQA2@TiO<sub>2</sub> - L+2

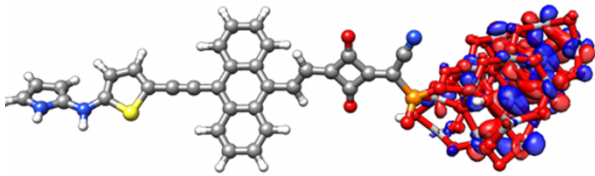

PASQA2@TiO<sub>2</sub> - L+6

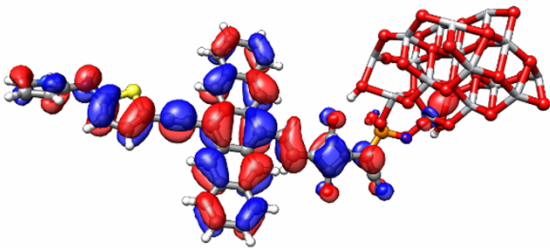

PPSQA2@TiO<sub>2</sub> - H

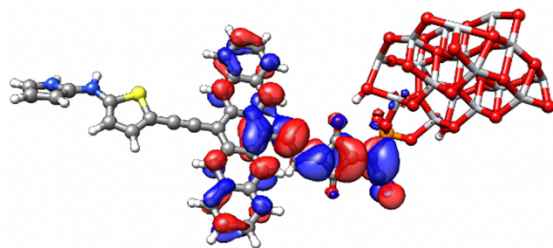

PPSQA2@TiO<sub>2</sub> - L

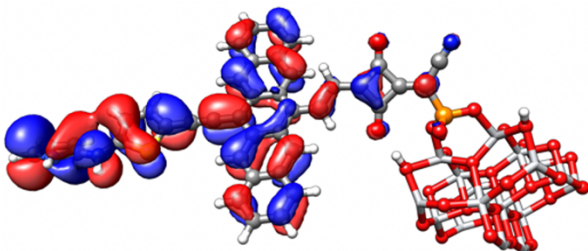

PPSQA2@TiO<sub>2</sub> - H-1

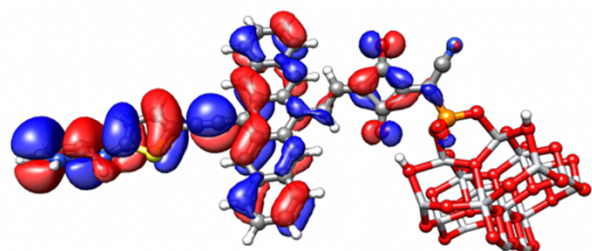

PPSQA2@TiO<sub>2</sub> - H-2

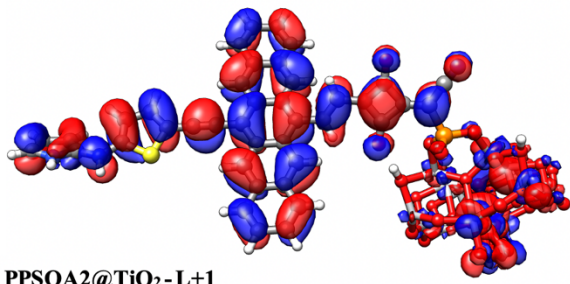

PPSQA2@TiO<sub>2</sub>-L+1

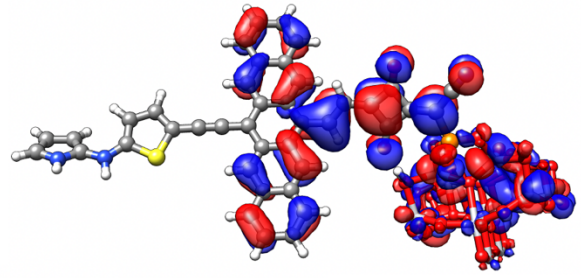

PPSQA2@TiO<sub>2</sub>-L+2

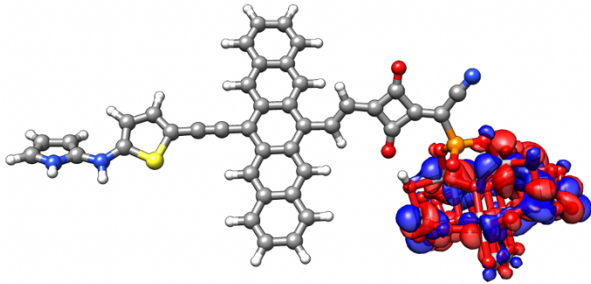

PPSQA2@TiO<sub>2</sub>-L+4

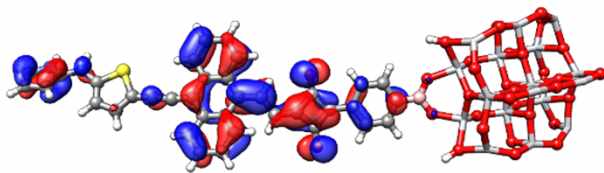

PASQA3@TiO<sub>2</sub>-H

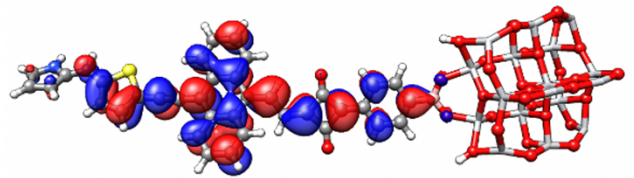

PASQA3@TiO<sub>2</sub>-L

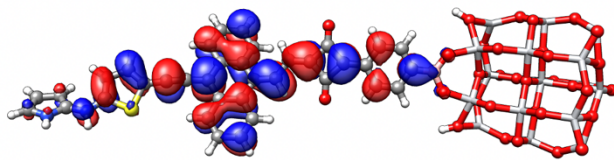

PASQA3@TiO<sub>2</sub>-H-1

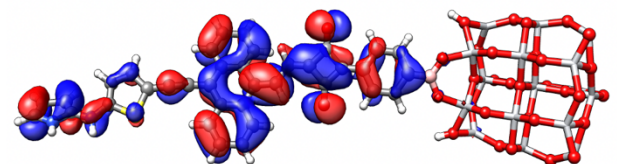

PASQA3@TiO<sub>2</sub>-H-2

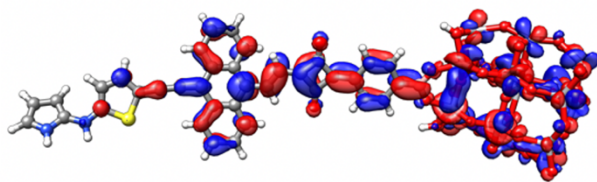

PASQA3@TiO<sub>2</sub>-L+1

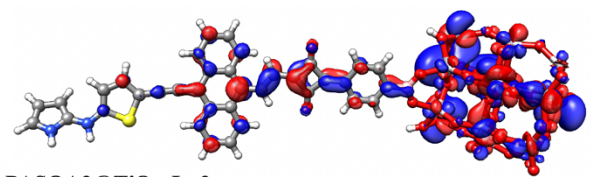

PASQA3@TiO<sub>2</sub>-L+3

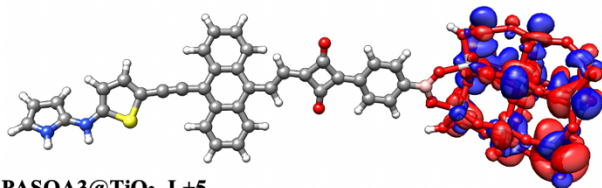

PASQA3@TiO<sub>2</sub>-L+5

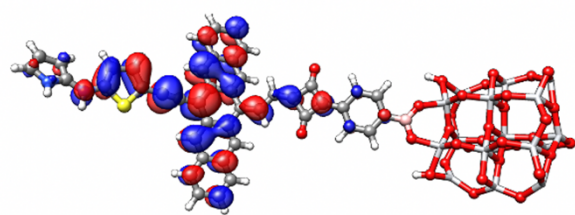

PPSQA3@TiO<sub>2</sub> - H

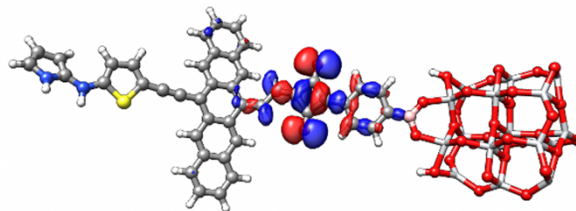

PPSQA3@TiO<sub>2</sub> - L

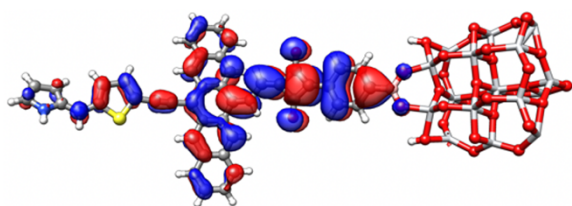

PPSQA3@TiO<sub>2</sub> - H-1

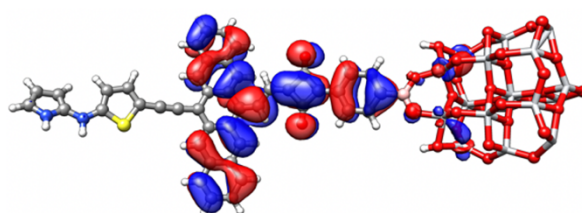

PPSQA3@TiO<sub>2</sub> - H-2

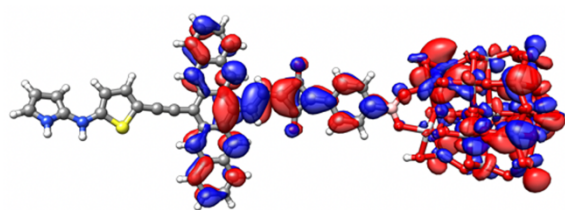

PPSQA3@TiO<sub>2</sub> - L+1

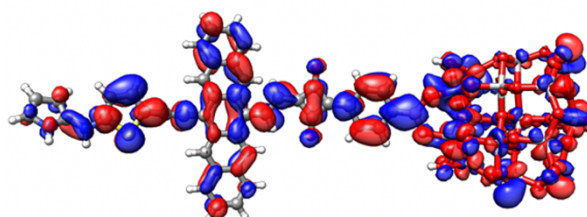

PPSQA3@TiO<sub>2</sub> - L+3

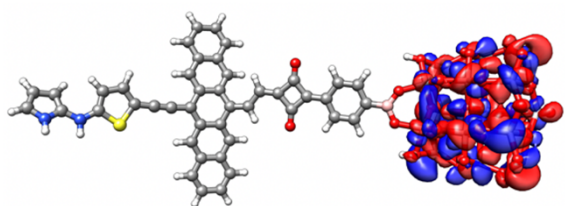

PPSQA3@TiO<sub>2</sub> - L+5

Figure S2: Diagram of natural transition orbitals (NTO  $S_0 \rightarrow S_1$ ) of the TiO<sub>2</sub>@dyes in acetonitrile at TD-CAM-B3LYP/6-31G(d)/LANL2DZ level/SMD level. The surfaces are generated with an isovalue at 0.015.

Table S1: Absorption wavelengths, main contributions to the transitions,  $S_0 \rightarrow S_1$  for the dyes in acetonitrile at TD-CAM-B3LYP/6-31G(d)/LANL2DZ/SMD level.

| Compound    | $\lambda$ (nm) | Main contribution to the transition                        |
|-------------|----------------|------------------------------------------------------------|
| PASQA1@TiO2 | 588.33         | H→L (48%)<br>H-1→L+2 (21%)<br>H-2→L+1 ((19%)<br>H→L+5 (8%) |
| PASQA2@TiO2 | 546.98         | H→L (47%)<br>H-3→L+1(27%)<br>H-3→L+1 (17%)<br>H→L+6 (7%)   |
| PASQA3@TiO2 | 601.66         | H→L (46%)<br>H-2→L+1(23%)<br>H-1→L+3(20%)<br>H→L+5(6%)     |
| PPSQA1@TiO2 | 1017.23        | H→L (40%)<br>H-1→L+2(29%)<br>H-2→L+1 (22%)<br>H→L+4 (6%)   |
| PPSQA2@TiO2 | 910.15         | H→L (42%)<br>H-2→L+1 (25%)<br>H-1→L+2(20%)<br>H→L+4 (5%)   |
| PPSQA3@TiO2 | 942.96         | H→L(41%)<br>H-1→L+3(30%)<br>H-2→L+1(22%)<br>H→L+5 (5%)     |

## PSQA1

|   |             |             |             |
|---|-------------|-------------|-------------|
| C | -3.10762900 | 0.71914200  | -0.07602900 |
| C | -5.68534700 | 0.27234900  | 0.00447200  |
| O | -8.00493600 | -0.09970700 | -0.00228400 |
| O | -6.68248000 | -1.85852400 | 0.44810800  |
| C | -6.78542200 | -0.68122600 | 0.17119900  |
| C | -0.92879800 | -0.78268800 | -0.04869500 |
| H | -0.64395600 | -1.83122300 | -0.02724500 |
| C | 0.03925600  | 0.18910000  | -0.05457900 |
| O | -2.86934700 | 1.92866300  | -0.11485600 |
| O | -3.69053500 | -2.53474400 | -0.06943500 |
| H | -8.67157000 | -0.78890900 | 0.16195400  |
| N | -6.34711700 | 2.75630900  | -0.21256200 |
| C | -6.03335000 | 1.64581600  | -0.11482300 |
| H | -0.29643500 | 1.22175900  | -0.07947000 |
| S | 2.54639600  | 1.35452000  | -0.05555500 |
| C | 3.94868400  | 0.31493000  | 0.04555800  |
| C | 3.57279900  | -1.01981600 | 0.07480100  |
| C | 2.18158300  | -1.19766800 | 0.04073500  |
| C | 1.44262600  | -0.02936700 | -0.02454300 |
| N | 5.19274900  | 0.87215100  | 0.08234700  |
| H | 4.27923500  | -1.83278200 | 0.14035800  |
| H | 1.71552300  | -2.17411100 | 0.07409900  |
| H | 5.25370400  | 1.87785300  | 0.17740000  |
| N | 7.52439800  | 0.76446500  | 0.55650500  |
| C | 8.61733800  | -0.03798400 | 0.32730000  |
| C | 8.18685200  | -1.13601500 | -0.37694100 |
| C | 6.78512200  | -0.99305000 | -0.59638800 |

|   |            |             |             |
|---|------------|-------------|-------------|
| C | 6.40977000 | 0.19818600  | -0.00448100 |
| H | 7.53613200 | 1.63700100  | 1.06639500  |
| H | 9.59415000 | 0.24450200  | 0.68362100  |
| H | 8.80453100 | -1.95627300 | -0.70912500 |
| H | 6.14420600 | -1.66735200 | -1.13907000 |

#### PSQA2

|   |             |             |             |
|---|-------------|-------------|-------------|
| C | -3.71268200 | 0.30446900  | -0.08837900 |
| C | -2.89611000 | -0.91639700 | -0.02169300 |
| C | -1.67642800 | -0.16789700 | -0.02500700 |
| C | -2.43574400 | 1.08204600  | -0.10259900 |
| C | -5.05244900 | 0.58217500  | -0.11483600 |
| C | -0.31284000 | -0.52328400 | 0.02406500  |
| H | -0.08002000 | -1.58318700 | 0.07043200  |
| C | 0.69795600  | 0.39958200  | 0.01036100  |
| O | -2.16197500 | 2.27453200  | -0.15609200 |
| O | -3.19486000 | -2.13795400 | 0.01529200  |
| N | -5.93508800 | 2.99305200  | -0.25301200 |
| C | -5.51170400 | 1.91569500  | -0.19131600 |
| H | 0.41629400  | 1.44750600  | -0.03573800 |
| S | 3.26422600  | 1.43475300  | 0.00094800  |
| C | 4.61044300  | 0.32265600  | 0.09848000  |
| C | 4.16509600  | -0.98957000 | 0.13856800  |
| C | 2.76583900  | -1.09372800 | 0.11482400  |
| C | 2.09010200  | 0.11098400  | 0.04678500  |
| N | 5.88394100  | 0.81098100  | 0.12184400  |
| H | 4.82870200  | -1.83810600 | 0.20241800  |
| H | 2.24926400  | -2.04415000 | 0.15465000  |
| H | 6.00173000  | 1.81214700  | 0.20835500  |
| N | 8.21954900  | 0.55287800  | 0.52277900  |
| C | 9.25585300  | -0.30369900 | 0.23398800  |
| C | 8.74048800  | -1.35098500 | -0.49047100 |
| C | 7.34388200  | -1.11938300 | -0.66097200 |
| C | 7.05739000  | 0.07143400  | -0.02085300 |
| H | 8.29751300  | 1.40451500  | 1.06115200  |
| H | 10.25797200 | -0.09056700 | 0.56753400  |
| H | 9.29863900  | -2.19407500 | -0.86781100 |
| H | 6.64704600  | -1.73650500 | -1.20299800 |
| P | -6.32594300 | -0.70471200 | -0.01707900 |
| O | -7.55034200 | -0.35451200 | -0.77389500 |
| O | -5.64118900 | -2.05283900 | -0.40809500 |
| H | -4.61398100 | -2.16641100 | -0.19497500 |
| O | -6.62119200 | -0.92628700 | 1.56275400  |
| H | -7.23854600 | -0.26301600 | 1.91134200  |

#### PSQA3

|   |             |             |             |
|---|-------------|-------------|-------------|
| C | 2.47159800  | 0.76982300  | 0.01257200  |
| C | 1.75109200  | -0.55008400 | -0.03727300 |
| C | 0.47485000  | 0.13163500  | -0.02597300 |
| C | 1.12618400  | 1.42398000  | 0.01962300  |
| C | 3.74362900  | 1.28807600  | 0.04686200  |
| C | -0.86193100 | -0.32841800 | -0.04809800 |
| H | -1.00783100 | -1.40538200 | -0.07848000 |
| C | -1.94804300 | 0.50021500  | -0.03243100 |
| O | 0.74817400  | 2.59615800  | 0.05072100  |
| O | 2.08920700  | -1.73638600 | -0.07221500 |
| N | 3.97694400  | 3.86047200  | 0.16127600  |
| C | 3.83902400  | 2.71235100  | 0.10825800  |
| H | -1.76028000 | 1.56941100  | -0.00024400 |
| S | -4.59083000 | 1.31725200  | -0.00650600 |

|   |              |             |             |
|---|--------------|-------------|-------------|
| C | -5.85098000  | 0.10468100  | -0.09396300 |
| C | -5.30609600  | -1.16497200 | -0.12984500 |
| C | -3.89644700  | -1.16051500 | -0.11114700 |
| C | -3.31700100  | 0.08998200  | -0.05357200 |
| N | -7.15989500  | 0.50539900  | -0.11503800 |
| H | -5.89852600  | -2.06499200 | -0.18937000 |
| H | -3.30909500  | -2.06912200 | -0.14871800 |
| H | -7.34345100  | 1.49472300  | -0.21674400 |
| N | -9.48839300  | 0.14019500  | -0.44184400 |
| C | -10.46763700 | -0.78750000 | -0.16654800 |
| C | -9.86977500  | -1.84315000 | 0.47610100  |
| C | -8.48036100  | -1.54570200 | 0.60924800  |
| C | -8.28167000  | -0.30580700 | 0.03054500  |
| H | -9.63284900  | 1.01571100  | -0.92494500 |
| H | -11.49131500 | -0.61119500 | -0.45267800 |
| H | -10.36696800 | -2.73605700 | 0.82306500  |
| H | -7.73359000  | -2.15451100 | 1.08996700  |
| C | 5.02652600   | 0.55626900  | 0.02970100  |
| C | 6.24985900   | 1.24927900  | 0.08007200  |
| C | 5.07899500   | -0.84767700 | -0.03987300 |
| C | 7.46052600   | 0.57149500  | 0.06150900  |
| H | 6.25772100   | 2.33094700  | 0.13465400  |
| C | 6.29592300   | -1.51167800 | -0.05785000 |
| H | 4.15720500   | -1.41517600 | -0.07845800 |
| C | 7.52134200   | -0.82722400 | -0.00868800 |
| H | 8.37929500   | 1.14578400  | 0.10188700  |
| H | 6.29448100   | -2.59488200 | -0.11230000 |
| B | 8.88684500   | -1.58706500 | -0.03130000 |
| O | 8.87038000   | -2.95718900 | -0.10589900 |
| H | 9.74119200   | -3.37624300 | -0.11549500 |
| O | 10.04416100  | -0.85163800 | 0.02438500  |
| H | 10.85944500  | -1.37010900 | 0.00637400  |

#### PASQA1

|   |              |             |             |
|---|--------------|-------------|-------------|
| C | 7.61758000   | -0.08516400 | -0.30277200 |
| C | 6.67375200   | -1.06925200 | -0.91761000 |
| C | 5.55238100   | -0.39550200 | -0.30496500 |
| C | 6.41727600   | 0.59551200  | 0.31144300  |
| C | 8.98400700   | 0.01470300  | -0.36238500 |
| C | 4.15233800   | -0.62951100 | -0.31254200 |
| H | 3.80773300   | -1.48327000 | -0.88774300 |
| C | 3.26106300   | 0.17753200  | 0.32192500  |
| O | 6.22603900   | 1.57021200  | 1.02810900  |
| O | 6.82592600   | -2.04730800 | -1.64728800 |
| H | 3.67303600   | 1.05189700  | 0.81264100  |
| S | -6.02496600  | 1.10831400  | -0.16276200 |
| C | -7.51530700  | 0.18478000  | -0.21453300 |
| C | -7.26735700  | -1.16574400 | -0.06118300 |
| C | -5.89590500  | -1.46208800 | 0.07323600  |
| C | -5.06165500  | -0.36599700 | 0.03677200  |
| N | -8.69653600  | 0.84978300  | -0.38651600 |
| H | -8.04133700  | -1.91729200 | -0.06680200 |
| H | -5.51347200  | -2.46788900 | 0.18854900  |
| H | -8.65096200  | 1.83746700  | -0.60078500 |
| N | -11.01425000 | 0.93428400  | -0.92306500 |
| C | -12.19156000 | 0.27457500  | -0.65430800 |
| C | -11.89480800 | -0.78762900 | 0.16372400  |
| C | -10.49028200 | -0.76910600 | 0.41397300  |
| C | -9.97813700  | 0.31398200  | -0.27529400 |
| H | -10.92198300 | 1.74730500  | -1.51600600 |
| H | -13.12459700 | 0.61972300  | -1.06797600 |



|   |              |             |             |
|---|--------------|-------------|-------------|
| H | -12.60255200 | -1.50369300 | 0.55246700  |
| H | -9.93771800  | -1.45011400 | 1.03893100  |
| C | -3.67185600  | -0.30132500 | 0.12454500  |
| C | -2.46063600  | -0.22238500 | 0.19775600  |
| C | -0.41670100  | 1.13319000  | 0.20075900  |
| C | 1.01637300   | 1.21745100  | 0.23018900  |
| C | 1.81053000   | 0.03932500  | 0.35211500  |
| C | 1.16095500   | -1.21788700 | 0.51470600  |
| C | -0.27333000  | -1.30774100 | 0.44846100  |
| C | -1.05391000  | -0.13398100 | 0.27837700  |
| C | -1.17831500  | 2.32956100  | 0.07218800  |
| C | -0.57516700  | 3.55140800  | -0.03126100 |
| C | 0.83706300   | 3.64114900  | -0.02685200 |
| C | 1.60174800   | 2.51312100  | 0.08910500  |
| C | 1.87691600   | -2.41822200 | 0.81139700  |
| C | 1.24395200   | -3.62173300 | 0.95446400  |
| C | -0.16125800  | -3.71279600 | 0.81260900  |
| C | -0.89368500  | -2.58350500 | 0.57883200  |
| H | -2.25820900  | 2.25736100  | 0.05661600  |
| H | 2.67733300   | 2.61347200  | 0.06613900  |
| H | 2.94565100   | -2.37141500 | 0.95365900  |
| H | -1.97162700  | -2.64493400 | 0.50396300  |
| H | -1.17424200  | 4.44951500  | -0.12498100 |
| H | 1.31552900   | 4.60869800  | -0.12413400 |
| H | 1.82017100   | -4.50853900 | 1.19142900  |
| H | -0.65503900  | -4.67208000 | 0.91410500  |
| C | 9.71833400   | -0.94863200 | -1.11680500 |
| N | 10.34318100  | -1.71432300 | -1.71605600 |
| C | 9.83579400   | 1.02947100  | 0.27906900  |
| O | 11.04983400  | 1.05130900  | 0.17930700  |
| O | 9.15917300   | 1.94421300  | 0.99224900  |
| H | 9.81604900   | 2.55977600  | 1.36373000  |

## PASQA2

|   |              |             |             |
|---|--------------|-------------|-------------|
| C | 6.97466600   | 0.31042300  | 0.44850900  |
| C | 6.01881400   | 1.32789600  | 0.99438000  |
| C | 4.91643000   | 0.64110400  | 0.33926400  |
| C | 5.81208900   | -0.36053100 | -0.21971100 |
| C | 8.32879200   | 0.13643800  | 0.55072900  |
| C | 3.51496600   | 0.86127000  | 0.31410100  |
| H | 3.14372300   | 1.67146300  | 0.93281200  |
| C | 2.66139300   | 0.04350900  | -0.34744300 |
| O | 5.68370600   | -1.34755900 | -0.93987900 |
| O | 6.14699200   | 2.32103700  | 1.70531600  |
| H | 3.10803600   | -0.85220200 | -0.75006500 |
| S | -6.49597100  | -0.85711500 | -0.24611700 |
| C | -8.02126100  | -0.09528300 | 0.17833000  |
| C | -7.81508100  | 1.21488000  | 0.57419900  |
| C | -6.46007800  | 1.59487700  | 0.55124100  |
| C | -5.59372700  | 0.61233700  | 0.13975400  |
| N | -9.14829900  | -0.86499200 | 0.05694000  |
| H | -8.59217600  | 1.88417600  | 0.88567700  |
| H | -6.11553300  | 2.58010800  | 0.83565100  |
| H | -8.98459000  | -1.82575700 | -0.20854500 |
| N | -11.37977300 | -1.60667000 | 0.07650300  |
| C | -12.66814600 | -1.17045200 | 0.25880100  |
| C | -12.61375500 | 0.16350500  | 0.52931500  |
| C | -11.24584300 | 0.56116200  | 0.51271900  |
| C | -10.50226200 | -0.56734100 | 0.22485500  |
| H | -11.11606600 | -2.55710300 | -0.13678600 |
| H | -13.50105200 | -1.84878800 | 0.17978200  |

|   |              |             |             |
|---|--------------|-------------|-------------|
| H | -13.45934700 | 0.80478800  | 0.72226800  |
| H | -10.88752200 | 1.55485300  | 0.68468200  |
| C | -4.21079900  | 0.66551900  | 0.00434200  |
| C | -3.02074000  | 0.60968200  | -0.14367400 |
| C | -1.05585200  | -0.83854500 | -0.17279100 |
| C | 0.36954800   | -1.00923000 | -0.24276300 |
| C | 1.21844200   | 0.14596600  | -0.41509900 |
| C | 0.60890500   | 1.40559400  | -0.64324600 |
| C | -0.80531400  | 1.57279800  | -0.51833200 |
| C | -1.62883400  | 0.45128300  | -0.26294900 |
| C | -1.89022100  | -1.96764600 | 0.01998700  |
| C | -1.37833000  | -3.21664400 | 0.15145000  |
| C | 0.01706400   | -3.40340400 | 0.11145500  |
| C | 0.85722100   | -2.34170100 | -0.06286300 |
| C | 1.36007500   | 2.51099500  | -1.12959900 |
| C | 0.78843200   | 3.73295900  | -1.32508300 |
| C | -0.58701200  | 3.92453800  | -1.06560600 |
| C | -1.36057600  | 2.86569900  | -0.69850900 |
| H | -2.96110300  | -1.81424100 | 0.06522200  |
| H | 1.91428100   | -2.54522700 | -0.05437300 |
| H | 2.39498900   | 2.36596900  | -1.40643400 |
| H | -2.42666000  | 2.99388200  | -0.56360000 |
| H | -2.03673100  | -4.06318400 | 0.29844400  |
| H | 0.43321800   | -4.39623600 | 0.23110100  |
| H | 1.38783700   | 4.55072300  | -1.70584100 |
| H | -1.03389500  | 4.90097000  | -1.20446700 |
| C | 9.10638000   | 1.06636300  | 1.28527100  |
| N | 9.75582600   | 1.81098900  | 1.88857200  |
| P | 9.26943400   | -1.21202200 | -0.17499400 |
| O | 10.71347200  | -1.21476300 | 0.15118700  |
| O | 8.48169600   | -2.52340600 | 0.30886600  |
| H | 9.09104900   | -3.27071800 | 0.43562500  |
| O | 8.97227700   | -1.11539800 | -1.75197800 |
| H | 9.78385400   | -1.26200500 | -2.26677700 |

### PASQA3

|   |              |             |             |
|---|--------------|-------------|-------------|
| C | 6.38418500   | 0.30506000  | 0.24438800  |
| C | 5.52379500   | 1.46058400  | 0.43168900  |
| C | 4.36442400   | 0.71474600  | -0.14042700 |
| C | 5.28138800   | -0.45523200 | -0.31807600 |
| C | 3.05738800   | 1.01618600  | -0.38605000 |
| H | 2.72672400   | 2.01453600  | -0.12176100 |
| C | 2.13532100   | 0.06958000  | -0.90468500 |
| O | 5.13067700   | -1.59622900 | -0.76480200 |
| O | 5.65769200   | 2.60468100  | 0.87525200  |
| H | 2.54694000   | -0.92819100 | -0.98792400 |
| S | -6.87726400  | -1.22897300 | 0.17768700  |
| C | -8.32903900  | -0.38679000 | 0.69157500  |
| C | -8.10098500  | 0.97133100  | 0.80419600  |
| C | -6.77445500  | 1.33576100  | 0.50212700  |
| C | -5.95201500  | 0.28504200  | 0.14474500  |
| N | -9.46767500  | -1.10924900 | 0.91389400  |
| H | -8.85714500  | 1.67672300  | 1.11210500  |
| H | -6.41166000  | 2.35417400  | 0.54846400  |
| H | -9.39758100  | -2.11765800 | 0.87577200  |
| N | -11.66338300 | -1.35637500 | 1.80446800  |
| C | -12.86397100 | -0.68772400 | 1.86809000  |
| C | -12.70238600 | 0.51822200  | 1.23102200  |
| C | -11.36081400 | 0.58327000  | 0.75077300  |
| C | -10.74724000 | -0.59781700 | 1.12355500  |
| H | -11.47816500 | -2.26334600 | 2.20954900  |

|   |              |             |             |
|---|--------------|-------------|-------------|
| H | -13.71635300 | -1.12904100 | 2.35754600  |
| H | -13.46072700 | 1.27669000  | 1.11093500  |
| H | -10.91581000 | 1.38430300  | 0.18482200  |
| C | -4.60790800  | 0.28894900  | -0.20615300 |
| C | -3.42825400  | 0.27460300  | -0.52229500 |
| C | -1.42380800  | -0.97098400 | -1.21477200 |
| C | -0.01418900  | -1.00038200 | -1.42845100 |
| C | 0.78356400   | 0.20570400  | -1.20116900 |
| C | 0.06430900   | 1.47406700  | -1.21486900 |
| C | -1.34351100  | 1.49745000  | -0.98007100 |
| C | -2.07675100  | 0.26476600  | -0.87264700 |
| C | -2.16503700  | -2.17060200 | -1.35209800 |
| C | -1.56210500  | -3.34937100 | -1.72307500 |
| C | -0.18110100  | -3.37261200 | -1.97708000 |
| C | 0.56763900   | -2.22461700 | -1.82558500 |
| C | 0.70531400   | 2.70044700  | -1.49345700 |
| C | 0.02921300   | 3.90349900  | -1.45179500 |
| C | -1.33427800  | 3.92891600  | -1.12204400 |
| C | -2.00462500  | 2.74704100  | -0.90337100 |
| H | -3.23309300  | -2.14549300 | -1.17587200 |
| H | 1.62660600   | -2.26870400 | -2.04156700 |
| H | 1.74450900   | 2.69880700  | -1.78752400 |
| H | -3.06749000  | 2.76269200  | -0.69774400 |
| C | 7.76553900   | 0.02616600  | 0.50743100  |
| C | 8.32666300   | -1.23561400 | 0.20985000  |
| C | 8.61335000   | 1.00503500  | 1.07187900  |
| C | 9.66295300   | -1.49512100 | 0.46551400  |
| H | 7.69511600   | -2.00180400 | -0.22322500 |
| C | 9.94756500   | 0.72898800  | 1.32050300  |
| H | 8.20454000   | 1.97986700  | 1.30875900  |
| C | 10.51265800  | -0.52483200 | 1.02619500  |
| H | 10.06250800  | -2.47424600 | 0.22480400  |
| H | 10.57127600  | 1.50316400  | 1.75397000  |
| B | 12.01812800  | -0.82552900 | 1.30794500  |
| O | 12.79568600  | 0.17097300  | 1.84500800  |
| H | 13.71904200  | -0.06984000 | 1.99771600  |
| O | 12.50507300  | -2.07393700 | 1.00695300  |
| H | 13.44330700  | -2.20286100 | 1.19928800  |
| H | 0.55132900   | 4.82374800  | -1.68619600 |
| H | -1.86638800  | 4.87182200  | -1.07211400 |
| H | 0.29847600   | -4.28968000 | -2.29876200 |
| H | -2.15275600  | -4.25129900 | -1.83376200 |

#### PPSQA1

|   |             |             |             |
|---|-------------|-------------|-------------|
| C | -7.56298200 | 0.01621600  | 0.41559300  |
| C | -6.64666300 | -0.99928300 | 1.01593500  |
| C | -5.51108400 | -0.37547600 | 0.37225300  |
| C | -6.35582100 | 0.63903700  | -0.23904600 |
| C | -8.92140300 | 0.19071200  | 0.52910100  |
| C | -4.12321400 | -0.64953000 | 0.36899800  |
| H | -3.79819900 | -1.50417800 | 0.95313100  |
| C | -3.21468800 | 0.13873900  | -0.27731600 |
| O | -6.14256300 | 1.59956500  | -0.96940200 |
| O | -6.81792400 | -1.96708100 | 1.75562300  |
| H | -3.62507300 | 1.01724300  | -0.76077200 |
| S | 6.05739600  | 1.09250500  | 0.18973500  |
| C | 7.54929100  | 0.18158800  | 0.33101300  |
| C | 7.30671700  | -1.17942800 | 0.28616700  |
| C | 5.93997300  | -1.49106500 | 0.16322700  |
| C | 5.10031400  | -0.39749600 | 0.10159700  |
| N | 8.72702700  | 0.85976700  | 0.45820800  |

|   |              |             |             |
|---|--------------|-------------|-------------|
| H | 8.08375900   | -1.92416600 | 0.36107500  |
| H | 5.56150400   | -2.50418500 | 0.12648300  |
| H | 8.67882800   | 1.86067300  | 0.59914500  |
| N | 11.04344300  | 0.97975200  | 0.99748300  |
| C | 12.22200500  | 0.30746200  | 0.77149700  |
| C | 11.92947400  | -0.80158200 | 0.01597700  |
| C | 10.52619500  | -0.79999100 | -0.23918000 |
| C | 10.01044900  | 0.32075400  | 0.38396000  |
| H | 10.94806200  | 1.82647700  | 1.54081800  |
| H | 13.15333900  | 0.67767500  | 1.16692400  |
| H | 12.63959000  | -1.53776300 | -0.32820900 |
| H | 9.97598700   | -1.51724100 | -0.82458400 |
| C | 3.71474700   | -0.34603800 | -0.00799600 |
| C | 2.50308800   | -0.27405000 | -0.10542000 |
| C | 0.47421000   | 1.08816100  | -0.28085100 |
| C | -0.97184300  | 1.17998600  | -0.31935700 |
| C | -1.77595300  | -0.00772200 | -0.32227300 |
| C | -1.12739100  | -1.28271000 | -0.37546500 |
| C | 0.31767200   | -1.37528700 | -0.27805500 |
| C | 1.10457000   | -0.18895500 | -0.21594400 |
| C | 1.24101000   | 2.26687300  | -0.28075500 |
| C | 0.66440800   | 3.52802100  | -0.30633900 |
| C | -0.77345900  | 3.63046800  | -0.31268800 |
| C | -1.53891300  | 2.47117400  | -0.30567900 |
| C | -1.83731700  | -2.48202000 | -0.58548600 |
| C | -1.22307300  | -3.72765600 | -0.61198700 |
| C | 0.20330000   | -3.81581800 | -0.42260200 |
| C | 0.92845000   | -2.64210600 | -0.27762700 |
| H | 2.32091700   | 2.18911700  | -0.25820900 |
| H | -2.61253800  | 2.59158500  | -0.28425800 |
| H | -2.90187800  | -2.44636800 | -0.76131900 |
| H | 2.00556200   | -2.70424200 | -0.18430500 |
| C | -9.66908000  | -0.69274700 | 1.36234600  |
| N | -10.30596300 | -1.38726500 | 2.03222500  |
| C | -9.74750800  | 1.22045900  | -0.11830100 |
| O | -10.94682900 | 1.33887200  | 0.06510200  |
| O | -9.06851300  | 2.03117400  | -0.94707700 |
| H | -9.70854400  | 2.67003800  | -1.30821900 |
| C | -1.36716300  | 4.93302200  | -0.32005800 |
| C | -0.58964100  | 6.05270000  | -0.32645500 |
| C | 0.83555700   | 5.94976500  | -0.32365600 |
| C | 1.44221800   | 4.72921400  | -0.31323100 |
| C | 0.82134100   | -5.10647600 | -0.43106900 |
| C | 0.07726600   | -6.23195300 | -0.62562000 |
| C | -1.33434700  | -6.14443600 | -0.82885100 |
| C | -1.96253000  | -4.93454500 | -0.82525000 |
| H | -2.44896800  | 5.00970600  | -0.32262900 |
| H | -1.04881100  | 7.03445100  | -0.33363800 |
| H | 1.43148600   | 6.85502100  | -0.32874100 |
| H | 2.52357300   | 4.64683500  | -0.30892100 |
| H | 1.89380700   | -5.16927000 | -0.28270100 |
| H | 0.55301000   | -7.20578000 | -0.63084300 |
| H | -1.90347200  | -7.05341200 | -0.98554000 |
| H | -3.03427300  | -4.86619900 | -0.97645900 |

#### PPSQA2

|   |            |             |             |
|---|------------|-------------|-------------|
| C | 7.00997100 | -0.58984500 | -0.11647600 |
| C | 6.03495400 | -1.69490300 | -0.33546200 |
| C | 4.93104200 | -0.78098000 | -0.12052800 |
| C | 5.85158200 | 0.32030700  | 0.09728700  |
| C | 8.36679800 | -0.53315300 | -0.10256800 |

|   |              |             |             |
|---|--------------|-------------|-------------|
| C | 3.53515900   | -0.90605500 | -0.22827600 |
| H | 3.15608300   | -1.85512100 | -0.60356700 |
| C | 2.70143600   | 0.12945800  | 0.07248300  |
| O | 5.73392700   | 1.51315300  | 0.35186100  |
| O | 6.13652500   | -2.88374600 | -0.59135400 |
| H | 3.19705500   | 1.05917700  | 0.30934100  |
| S | -6.70903200  | 1.02603100  | 0.49468600  |
| C | -8.12445200  | 0.10881700  | 0.01172300  |
| C | -7.77949800  | -1.03630900 | -0.63870100 |
| C | -6.39168500  | -1.19741200 | -0.75723900 |
| C | -5.64378700  | -0.18440600 | -0.20676400 |
| N | -9.34196400  | 0.59777900  | 0.31103600  |
| H | -8.49662200  | -1.74935000 | -1.03004400 |
| H | -5.93731800  | -2.04849300 | -1.24085200 |
| H | -9.37490900  | 1.49747900  | 0.76387700  |
| N | -11.68673900 | 0.71356000  | 0.43984700  |
| C | -12.79909600 | -0.02810700 | 0.14517900  |
| C | -12.37219700 | -1.21158500 | -0.41010000 |
| C | -10.94879200 | -1.18837900 | -0.45273600 |
| C | -10.56551500 | 0.01529700  | 0.07996600  |
| H | -11.69062100 | 1.62934200  | 0.85922800  |
| H | -13.79124500 | 0.33096800  | 0.34898500  |
| H | -13.00392900 | -2.01497600 | -0.74956000 |
| H | -10.30412400 | -1.97200300 | -0.82628200 |
| C | -4.25497700  | -0.06666800 | -0.16147800 |
| C | -2.99633700  | 0.02085600  | -0.11923800 |
| C | -0.90611900  | 1.34335800  | -0.03096700 |
| C | 0.54494300   | 1.38987100  | 0.03865800  |
| C | 1.29451400   | 0.15341200  | 0.07759600  |
| C | 0.60543200   | -1.06859600 | 0.11581700  |
| C | -0.82632400  | -1.13587600 | -0.00680700 |
| C | -1.58630000  | 0.07491400  | -0.06449900 |
| C | -1.64648100  | 2.54222500  | -0.08282600 |
| C | -1.04197600  | 3.78809000  | -0.08021500 |
| C | 0.39048700   | 3.84058800  | -0.01576700 |
| C | 1.12450900   | 2.66575900  | 0.03433000  |
| C | 1.30210700   | -2.25393700 | 0.32550700  |
| C | 0.68989500   | -3.49806700 | 0.30712700  |
| C | -0.73133000  | -3.58190600 | 0.09487300  |
| C | -1.44979400  | -2.39788900 | -0.03840500 |
| H | -2.72165800  | 2.48851600  | -0.12848200 |
| H | 2.19361400   | 2.79838600  | 0.07039900  |
| H | 2.36885000   | -2.22307300 | 0.52982100  |
| H | -2.52013000  | -2.44857400 | -0.15643400 |
| C | 9.09657600   | -1.72830300 | -0.23651400 |
| N | 9.72459500   | -2.69878800 | -0.32560100 |
| C | 1.02666000   | 5.12145300  | -0.00872400 |
| C | 0.28857900   | 6.26031500  | -0.06132800 |
| C | -1.13467300  | 6.20625800  | -0.12600500 |
| C | -1.78079600  | 5.01232600  | -0.13588400 |
| C | -1.34604700  | -4.87163500 | 0.04854000  |
| C | -0.59939000  | -5.99630700 | 0.20376700  |
| C | 0.80644800   | -5.91246500 | 0.41918300  |
| C | 1.43216500   | -4.70725500 | 0.47235800  |
| H | 2.10653200   | 5.17097500  | 0.03916700  |
| H | 0.78336000   | 7.22255700  | -0.05498000 |
| H | -1.70044800  | 7.12765000  | -0.16792100 |
| H | -2.86089800  | 4.97204200  | -0.18628900 |
| H | -2.41421100  | -4.93887700 | -0.11003100 |
| H | -1.07343700  | -6.96823800 | 0.16625500  |
| H | 1.37985800   | -6.82200200 | 0.54041900  |
| H | 2.50040300   | -4.65134100 | 0.63526500  |

|   |             |            |             |
|---|-------------|------------|-------------|
| P | 9.35563500  | 0.94818900 | 0.05448800  |
| O | 10.81675500 | 0.75739500 | -0.05974600 |
| O | 8.89422700  | 1.59965400 | 1.45383400  |
| H | 9.65701700  | 2.00636800 | 1.89926300  |
| O | 8.74125900  | 1.95231400 | -1.04720600 |
| H | 9.45784100  | 2.41164300 | -1.51729100 |

PPSQA3

|   |              |             |             |
|---|--------------|-------------|-------------|
| C | 6.37127200   | 0.26267400  | 0.59358400  |
| C | 5.53265200   | 1.44473300  | 0.59760600  |
| C | 4.39273400   | 0.66377300  | 0.02071400  |
| C | 5.29847200   | -0.53461300 | 0.03224500  |
| C | 3.12178000   | 0.95872600  | -0.34352800 |
| H | 2.79208400   | 1.98427600  | -0.21533900 |
| C | 2.20669500   | -0.02795800 | -0.83434300 |
| O | 5.15335700   | -1.71275200 | -0.30676500 |
| O | 5.66099000   | 2.62671500  | 0.92937300  |
| H | 2.59158700   | -1.04064900 | -0.79282900 |
| S | -6.61437500  | -1.25346700 | 0.69593400  |
| C | -8.00710500  | -0.37946300 | 1.31063800  |
| C | -7.76809200  | 0.98279400  | 1.33678500  |
| C | -6.47954300  | 1.32528800  | 0.89036900  |
| C | -5.69540900  | 0.25328900  | 0.50206700  |
| N | -9.11806900  | -1.08261000 | 1.67677200  |
| H | -8.49002600  | 1.70551200  | 1.68403400  |
| H | -6.11210100  | 2.34236000  | 0.85389300  |
| H | -9.05263500  | -2.09199400 | 1.68431900  |
| N | -11.18072400 | -1.27733700 | 2.85253700  |
| C | -12.36205100 | -0.59898900 | 3.04091100  |
| C | -12.28244000 | 0.57832900  | 2.33775300  |
| C | -11.01399600 | 0.61429600  | 1.68714600  |
| C | -10.35896000 | -0.55382200 | 2.02837200  |
| H | -10.94595000 | -2.16761700 | 3.26895800  |
| H | -13.14496000 | -1.01337800 | 3.65428700  |
| H | -13.04935200 | 1.33568700  | 2.28330900  |
| H | -10.64463700 | 1.38712600  | 1.03429800  |
| C | -4.39387900  | 0.23827200  | 0.02697400  |
| C | -3.24515300  | 0.21288500  | -0.39352700 |
| C | -1.31214800  | -1.06004200 | -1.22903000 |
| C | 0.10183700   | -1.09546500 | -1.50632500 |
| C | 0.90752400   | 0.11278500  | -1.24962700 |
| C | 0.19682000   | 1.39516700  | -1.35522600 |
| C | -1.21583800  | 1.43365200  | -1.06236100 |
| C | -1.93343200  | 0.19306600  | -0.84958400 |
| C | -2.05535800  | -2.23043900 | -1.35336600 |
| C | -1.48246500  | -3.43903500 | -1.78726900 |
| C | -0.09050100  | -3.45926500 | -2.11675600 |
| C | 0.66139200   | -2.27397300 | -1.96134900 |
| C | 0.82676900   | 2.56529200  | -1.73261000 |
| C | 0.16183000   | 3.81242700  | -1.75436400 |
| C | -1.21409100  | 3.86394500  | -1.36957200 |
| C | -1.86900500  | 2.66209800  | -1.04338800 |
| H | -3.11624300  | -2.21205700 | -1.13334300 |
| H | 1.71365100   | -2.30700500 | -2.21752800 |
| H | 1.86264800   | 2.54119000  | -2.04296800 |
| H | -2.92570100  | 2.69889500  | -0.80660100 |
| C | 7.72398900   | -0.01155100 | 0.99025000  |
| C | 8.27393300   | -1.30594600 | 0.86662900  |
| C | 8.55037100   | 1.00493700  | 1.51681400  |
| C | 9.58049800   | -1.56088600 | 1.25052300  |
| H | 7.65821700   | -2.10199900 | 0.46584300  |

|   |             |             |             |
|---|-------------|-------------|-------------|
| C | 9.85483600  | 0.73321400  | 1.89611300  |
| H | 8.14951600  | 2.00592200  | 1.62137700  |
| C | 10.40904300 | -0.55337500 | 1.77516500  |
| H | 9.97222800  | -2.56639600 | 1.14196100  |
| H | 10.46267700 | 1.53705700  | 2.29694700  |
| B | 11.88006800 | -0.85045300 | 2.20400900  |
| C | 0.81505400  | 5.01141700  | -2.13562000 |
| H | 1.85793600  | 4.96792200  | -2.43058600 |
| C | -1.87995100 | 5.11935300  | -1.36860700 |
| C | -1.21658600 | 6.26356200  | -1.73529900 |
| H | -1.73389500 | 7.21606100  | -1.73100900 |
| C | 0.14316800  | 6.20985300  | -2.12496300 |
| H | 0.65318400  | 7.12137100  | -2.41432000 |
| H | -2.92362600 | 5.15748100  | -1.07587500 |
| C | 0.48656100  | -4.66741300 | -2.58496700 |
| C | -2.24051900 | -4.63272100 | -1.93228900 |
| H | -3.29571600 | -4.61488700 | -1.68176500 |
| C | -1.65039700 | -5.78623300 | -2.38382500 |
| H | -2.23731200 | -6.69118900 | -2.49090000 |
| C | -0.27360300 | -5.80405000 | -2.71458700 |
| H | 0.17868100  | -6.72230300 | -3.07099800 |
| H | 1.54181400  | -4.67979700 | -2.83566300 |
| O | 12.63605100 | 0.17849300  | 2.70962800  |
| H | 13.53870800 | -0.06186700 | 2.95710500  |
| O | 12.36006300 | -2.12889400 | 2.05844000  |
| H | 13.27650400 | -2.25438800 | 2.33820500  |

PASQA1@TiO<sub>2</sub>

|   |              |             |             |
|---|--------------|-------------|-------------|
| C | -2.62106300  | 4.06441500  | -0.30849800 |
| C | -3.90354800  | 4.83019900  | -0.44212700 |
| C | -4.64968700  | 3.58304800  | -0.40100000 |
| C | -3.43040600  | 2.79196400  | -0.29561600 |
| C | -1.30754600  | 4.47816900  | -0.28747300 |
| C | -6.03213100  | 3.25624900  | -0.45803800 |
| H | -6.73134200  | 4.08875700  | -0.49699900 |
| C | -6.48069300  | 1.96539200  | -0.42541000 |
| O | -3.19111400  | 1.58439900  | -0.25413300 |
| O | -4.17054000  | 6.02820100  | -0.53828000 |
| H | -5.71336100  | 1.20313500  | -0.32195600 |
| S | -14.95556400 | -2.07304600 | 0.64927500  |
| C | -16.62134500 | -1.85895300 | 0.11957600  |
| C | -16.74124700 | -0.77227400 | -0.73302900 |
| C | -15.51489100 | -0.10797900 | -0.95469600 |
| C | -14.42918200 | -0.65513500 | -0.29323400 |
| N | -17.58103800 | -2.72730400 | 0.56641000  |
| H | -17.68148100 | -0.46297500 | -1.16807600 |
| H | -15.41703700 | 0.76780600  | -1.58659500 |
| H | -17.31368600 | -3.42030200 | 1.25398500  |
| N | -19.90009400 | -3.18572200 | 0.94129500  |
| C | -21.09539300 | -3.22644500 | 0.25867500  |
| C | -20.84572100 | -2.85631400 | -1.04506400 |
| C | -19.44770000 | -2.59345700 | -1.16459700 |
| C | -18.89233300 | -2.80886300 | 0.08679000  |
| H | -19.77983100 | -3.38132400 | 1.92620300  |
| H | -22.00724300 | -3.51622300 | 0.75909600  |
| H | -21.58008200 | -2.78728600 | -1.83626000 |
| H | -18.91040400 | -2.30720400 | -2.05653600 |
| C | -13.09381700 | -0.24879500 | -0.29813100 |
| C | -11.92266500 | 0.10894900  | -0.31871000 |
| C | -9.57630300  | -0.10508500 | 0.39167500  |
| C | -8.21996400  | 0.37824500  | 0.36211700  |

|    |              |             |             |
|----|--------------|-------------|-------------|
| C  | -7.86224700  | 1.49926100  | -0.45432100 |
| C  | -8.86211900  | 2.10337300  | -1.27755700 |
| C  | -10.23056700 | 1.65212000  | -1.21263500 |
| C  | -10.58132700 | 0.55167500  | -0.37724900 |
| C  | -9.89847800  | -1.22583800 | 1.21423000  |
| C  | -8.94693000  | -1.84470900 | 1.98427500  |
| C  | -7.61494900  | -1.35662500 | 1.98520100  |
| C  | -7.27012700  | -0.27699200 | 1.21030900  |
| C  | -8.55437400  | 3.12130800  | -2.23641000 |
| C  | -9.52543600  | 3.71204000  | -3.00604400 |
| C  | -10.88196500 | 3.31764300  | -2.87574900 |
| C  | -11.21595800 | 2.30534300  | -2.01287500 |
| H  | -10.92270100 | -1.58325000 | 1.22269800  |
| H  | -6.25356000  | 0.09262200  | 1.25859500  |
| H  | -7.52245500  | 3.41378100  | -2.37733800 |
| H  | -12.24574300 | 1.97356300  | -1.93559100 |
| H  | -9.21336400  | -2.69734700 | 2.60185500  |
| H  | -6.86540600  | -1.83358200 | 2.60992600  |
| H  | -9.25104400  | 4.47460300  | -3.72908400 |
| H  | -11.64820600 | 3.79839600  | -3.47674600 |
| C  | -1.00955300  | 5.86073200  | -0.49505500 |
| N  | -0.73392000  | 6.98283200  | -0.65689600 |
| C  | -0.14953600  | 3.59531200  | -0.08013800 |
| O  | 1.01430500   | 4.07493700  | -0.35501000 |
| O  | -0.34574400  | 2.42130100  | 0.36626000  |
| Ti | 4.16252700   | -3.86222500 | -2.13643700 |
| O  | 2.78429600   | -2.59931900 | -1.88582200 |
| O  | 5.74619600   | -4.36039600 | -0.95228500 |
| O  | 3.52452900   | -5.53949700 | -1.68349800 |
| O  | 3.78126700   | -1.96641600 | 1.18165000  |
| O  | 5.99317100   | 0.71158100  | -0.29984600 |
| O  | 3.86887600   | -0.34603000 | -0.58801800 |
| O  | 1.50673000   | -2.94317300 | 0.64312900  |
| O  | 7.72968600   | -2.00607100 | -2.25205300 |
| O  | 5.38804200   | -3.00767200 | -3.33734600 |
| Ti | 7.67745600   | -2.22876900 | 1.66933200  |
| O  | 8.41319800   | -3.49514900 | 0.33456600  |
| O  | 6.46753100   | -1.97020000 | 0.19553200  |
| O  | 3.47570900   | -4.76725200 | 1.56513000  |
| O  | 1.87539300   | -2.08459100 | 3.32140200  |
| Ti | 5.18103000   | -0.66078500 | 0.90382800  |
| Ti | 5.82818200   | 0.49066700  | 3.63302000  |
| O  | 6.46503400   | -0.90049000 | 2.40313000  |
| O  | 4.55297600   | 0.63526700  | 2.17717100  |
| Ti | 2.61309700   | -3.14377900 | 1.97767300  |
| Ti | 7.22907800   | -3.22149800 | -0.93428300 |
| Ti | 4.31068500   | -5.28904400 | -0.01465100 |
| O  | 4.82903400   | -0.07357000 | -3.21963700 |
| O  | 1.09463800   | -0.44401400 | -0.50160700 |
| Ti | 4.60802500   | 0.95008000  | -1.79043000 |
| O  | 3.16877700   | 2.11519300  | -1.73791100 |
| Ti | 2.47329800   | -1.64752400 | -0.41923000 |
| Ti | 6.23055700   | -1.31823700 | -3.47061500 |
| O  | 7.60667500   | -0.50729000 | -4.39356100 |
| O  | 5.87750700   | 2.35823600  | -2.20351500 |
| O  | 8.45862600   | 1.25572300  | -1.69302400 |
| O  | 6.58904700   | 3.43092800  | 0.35916000  |
| Ti | 7.00716500   | 2.10440400  | -0.89731400 |
| Ti | 8.46507300   | -0.27190000 | -2.76407800 |
| Ti | 0.75129100   | 0.75590100  | 0.81824400  |
| O  | 2.02258300   | 1.16270700  | 3.77254700  |
| O  | -0.28522800  | 0.06220500  | 2.17128300  |



|    |            |             |             |
|----|------------|-------------|-------------|
| O  | 4.02257400 | 3.68247600  | 2.31749100  |
| O  | 2.28232100 | 1.92525400  | 1.05527300  |
| O  | 4.66112500 | 1.82965000  | 4.32017600  |
| Ti | 3.48656300 | 1.95607000  | 2.97157600  |
| Ti | 1.14564400 | -0.35948700 | 3.22608500  |
| Ti | 2.79240400 | 3.07644800  | -0.25936800 |
| Ti | 4.97804600 | 4.17643100  | 0.88056100  |
| H  | 3.12747200 | 5.75809000  | -0.26631100 |
| O  | 3.61983000 | 4.92338000  | -0.33163000 |

PASQA2@TiO<sub>2</sub>

|   |              |             |             |
|---|--------------|-------------|-------------|
| C | -3.28116500  | 1.71659800  | -1.87211400 |
| C | -4.37709900  | 1.80192400  | -2.90571100 |
| C | -5.27789500  | 1.10370000  | -2.00531600 |
| C | -4.24001800  | 0.94552300  | -0.99925800 |
| C | -2.01014300  | 2.20509900  | -1.79298600 |
| C | -6.66281700  | 0.77558100  | -2.05833200 |
| H | -7.20458800  | 1.10044700  | -2.94448700 |
| C | -7.32566600  | 0.17351000  | -1.02840300 |
| O | -4.17837500  | 0.42472900  | 0.11881900  |
| O | -4.44450800  | 2.30243100  | -4.02772100 |
| H | -6.73230900  | -0.03900300 | -0.14457000 |
| S | -16.35624600 | -0.18580900 | 1.30731100  |
| C | -17.97788100 | -0.40601700 | 0.65832800  |
| C | -17.93970800 | -0.76267500 | -0.67952600 |
| C | -16.62419800 | -0.84094500 | -1.19226500 |
| C | -15.62714900 | -0.55946500 | -0.27641600 |
| N | -19.05411500 | -0.22027100 | 1.48369900  |
| H | -18.82792700 | -0.94157900 | -1.26989600 |
| H | -16.40061400 | -1.09130000 | -2.22335800 |
| H | -18.88151300 | 0.14825600  | 2.41109200  |
| N | -21.40339900 | 0.17637200  | 1.71717100  |
| C | -22.61100300 | -0.34938200 | 1.31429500  |
| C | -22.34645400 | -1.42941600 | 0.50097000  |
| C | -20.92840200 | -1.57568300 | 0.41570900  |
| C | -20.37552400 | -0.56215700 | 1.18223600  |
| H | -21.28442700 | 0.99563600  | 2.29797000  |
| H | -23.54095600 | 0.08869000  | 1.64458800  |
| H | -23.08461100 | -2.05909700 | 0.02278700  |
| H | -20.38071000 | -2.33811400 | -0.11802000 |
| C | -14.24089000 | -0.52089900 | -0.44299500 |
| C | -13.02321200 | -0.47401300 | -0.56150800 |
| C | -10.83471300 | 0.01677900  | 0.45143100  |
| C | -9.40929200  | 0.17541200  | 0.31469800  |
| C | -8.75959900  | -0.08996000 | -0.93536200 |
| C | -9.53729900  | -0.59088100 | -2.02129300 |
| C | -10.97114300 | -0.70500900 | -1.90132600 |
| C | -11.61413000 | -0.38679000 | -0.67316400 |
| C | -11.44713400 | 0.29549300  | 1.71098900  |
| C | -10.71138900 | 0.72099000  | 2.78719700  |
| C | -9.31122500  | 0.90949900  | 2.65403900  |
| C | -8.68852700  | 0.65464000  | 1.45785300  |
| C | -8.94444000  | -1.05682800 | -3.23773300 |
| C | -9.70191400  | -1.50867100 | -4.28946000 |
| C | -11.11778200 | -1.53413800 | -4.19334400 |
| C | -11.72723300 | -1.15703500 | -3.02397000 |
| H | -12.51977000 | 0.16513000  | 1.80462800  |
| H | -7.62406700  | 0.83525200  | 1.38110400  |
| H | -7.86536900  | -1.08113400 | -3.31720200 |
| H | -12.80702000 | -1.21112700 | -2.92988200 |
| C | -1.50539000  | 2.95680500  | -2.88711500 |

|    |              |             |             |
|----|--------------|-------------|-------------|
| N  | -1.04240800  | 3.59128400  | -3.75099200 |
| P  | -0.91260800  | 2.04410300  | -0.32957800 |
| O  | 0.38709000   | 2.81658800  | -0.81060800 |
| O  | -0.53888200  | 0.50114300  | -0.27415700 |
| O  | -1.51540200  | 2.60881400  | 0.92596900  |
| Ti | 6.24837000   | -3.22669500 | -2.21024200 |
| O  | 4.46907500   | -2.56048100 | -2.28487500 |
| O  | 7.80532600   | -3.41658400 | -0.82338000 |
| O  | 6.04869500   | -5.09129200 | -1.75851700 |
| O  | 4.68012000   | -1.96834000 | 1.02266200  |
| O  | 6.05384500   | 1.46171900  | 0.27461500  |
| O  | 4.59260800   | -0.23755700 | -0.66975600 |
| O  | 3.05874700   | -3.60196800 | 0.00463100  |
| O  | 9.09382300   | -0.26637000 | -1.54252700 |
| O  | 7.21624900   | -1.70786200 | -2.79102900 |
| Ti | 8.24900500   | -1.11203500 | 2.20220600  |
| O  | 9.58872500   | -1.84774800 | 0.95430400  |
| O  | 7.32668100   | -0.98545500 | 0.51703800  |
| O  | 5.33223800   | -4.66759300 | 1.35232000  |
| O  | 2.61442900   | -2.83265700 | 2.75009800  |
| Ti | 5.56471900   | -0.27266700 | 1.09710700  |
| Ti | 5.24203700   | 0.56006800  | 3.96194500  |
| O  | 6.58684300   | -0.27780700 | 2.79145600  |
| O  | 4.30482100   | 0.59020200  | 2.27840800  |
| Ti | 3.87378200   | -3.53838500 | 1.53622000  |
| Ti | 8.64502000   | -1.77213900 | -0.51688800 |
| Ti | 6.53225500   | -4.65943900 | -0.08172100 |
| O  | 5.92526400   | 0.86695100  | -2.94427200 |
| O  | 2.00206800   | -1.26984500 | -0.97499400 |
| Ti | 5.05545800   | 1.43763600  | -1.51540100 |
| O  | 3.31849800   | 2.01217100  | -1.74273900 |
| Ti | 3.71395900   | -1.93538300 | -0.80596200 |
| Ti | 7.68749200   | 0.15315500  | -2.96312100 |
| O  | 8.82217200   | 1.67074400  | -3.26015000 |
| O  | 5.74395000   | 3.27991500  | -1.43213000 |
| O  | 8.33369400   | 2.98384000  | -0.39726400 |
| O  | 5.31397100   | 4.02486200  | 1.30300300  |
| Ti | 6.54999800   | 3.20759500  | 0.10250200  |
| Ti | 9.11512700   | 1.68461400  | -1.48274700 |
| Ti | 1.06914500   | -0.41738400 | 0.30973800  |
| O  | 1.41817800   | 0.06236300  | 3.31034100  |
| O  | -0.11718900  | -1.71121000 | 1.29987100  |
| O  | 2.58020900   | 3.19009500  | 2.61394100  |
| O  | 2.02054800   | 1.11565400  | 0.77865200  |
| O  | 3.58777000   | 1.36800100  | 4.49493900  |
| Ti | 2.72000700   | 1.35241900  | 2.93330800  |
| Ti | 1.21524300   | -1.65216100 | 2.74139100  |
| Ti | 2.25761700   | 2.55725500  | -0.38801000 |
| Ti | 3.50680500   | 4.19489500  | 1.41549800  |
| H  | 1.70250600   | 5.16736300  | -0.35134100 |
| O  | 2.41612300   | 4.53292000  | -0.16643200 |
| H  | -1.09121800  | -1.66666800 | 1.27148200  |
| H  | -8.72982300  | 1.26603200  | 3.50097500  |
| H  | -11.19991600 | 0.92366800  | 3.73732100  |
| H  | -9.21493600  | -1.86500100 | -5.19408100 |
| H  | -11.71367700 | -1.87995800 | -5.03468900 |

PASQA3@TiO<sub>2</sub>

|   |             |             |             |
|---|-------------|-------------|-------------|
| C | -5.68923800 | -1.14580900 | -0.48893800 |
| C | -6.66411600 | -2.22913700 | -0.74574700 |
| C | -7.79060800 | -1.33279300 | -0.36493500 |

|    |              |             |             |
|----|--------------|-------------|-------------|
| C  | -6.80567500  | -0.24089500 | -0.15317300 |
| C  | -9.16250400  | -1.46144100 | -0.23279400 |
| H  | -9.58614200  | -2.44134100 | -0.44583800 |
| C  | -10.01226900 | -0.39331500 | 0.12083600  |
| O  | -6.89316600  | 0.96482300  | 0.21216400  |
| O  | -6.57699600  | -3.43757100 | -1.09377600 |
| H  | -9.50956200  | 0.56790500  | 0.13025000  |
| S  | -18.98126000 | 1.61519200  | -0.67644900 |
| C  | -20.66820600 | 0.91559000  | -0.75978700 |
| C  | -20.64595300 | -0.44656100 | -0.55395100 |
| C  | -19.34220700 | -0.98751600 | -0.34123400 |
| C  | -18.29876800 | -0.08513800 | -0.36849100 |
| N  | -21.72237100 | 1.77540200  | -0.98487500 |
| H  | -21.53918400 | -1.05588900 | -0.56737600 |
| H  | -19.17031900 | -2.04452500 | -0.17192700 |
| H  | -21.51135900 | 2.72629500  | -1.26174600 |
| N  | -24.02597900 | 2.13228100  | -1.58605600 |
| C  | -25.29611500 | 1.67281500  | -1.25853000 |
| C  | -25.14616700 | 0.68182300  | -0.30583000 |
| C  | -23.74551300 | 0.53783800  | -0.03050600 |
| C  | -23.07765700 | 1.45211700  | -0.83956000 |
| H  | -23.82008600 | 2.83978600  | -2.27749800 |
| H  | -26.17501100 | 2.08881300  | -1.72386500 |
| H  | -25.94465100 | 0.12078700  | 0.15787400  |
| H  | -23.29240300 | -0.13016100 | 0.68458200  |
| C  | -16.92483400 | -0.25736300 | -0.20287500 |
| C  | -15.70770300 | -0.36576600 | -0.04154400 |
| C  | -13.58198200 | 0.87588100  | 0.15251700  |
| C  | -12.14720300 | 0.88157400  | 0.28654000  |
| C  | -11.40900200 | -0.38251500 | 0.35682100  |
| C  | -12.18962900 | -1.57667600 | 0.65884300  |
| C  | -13.62280200 | -1.57584600 | 0.49488500  |
| C  | -14.31262500 | -0.36286500 | 0.16598200  |
| C  | -14.26315800 | 2.12358100  | 0.00946500  |
| C  | -13.58830600 | 3.32773900  | 0.02240200  |
| C  | -12.18309700 | 3.34206600  | 0.18358800  |
| C  | -11.49228700 | 2.14834100  | 0.30337900  |
| C  | -11.59143500 | -2.75433100 | 1.19646600  |
| C  | -12.31676600 | -3.90859900 | 1.44221000  |
| C  | -13.70289400 | -3.93707400 | 1.16130500  |
| C  | -14.33687600 | -2.79349500 | 0.71616800  |
| H  | -15.34266300 | 2.11118100  | -0.09887500 |
| H  | -10.41871100 | 2.19609600  | 0.43451100  |
| H  | -10.54375500 | -2.73160200 | 1.46424300  |
| H  | -15.41006300 | -2.79755000 | 0.55735800  |
| C  | -4.29859000  | -1.00145300 | -0.52461600 |
| C  | -3.68676100  | 0.25880800  | -0.18941300 |
| C  | -3.41282900  | -2.09012100 | -0.85290100 |
| C  | -2.32042500  | 0.40404200  | -0.15290800 |
| H  | -4.33610700  | 1.09438600  | 0.05084700  |
| C  | -2.04494900  | -1.93952600 | -0.80530100 |
| H  | -3.85149000  | -3.04785800 | -1.11463300 |
| C  | -1.44772600  | -0.69289700 | -0.44008300 |
| H  | -1.88347300  | 1.35770000  | 0.12103900  |
| H  | -1.39833300  | -2.78076500 | -1.03566900 |
| C  | -0.04661300  | -0.54884800 | -0.30483400 |
| O  | 0.77367300   | -1.53126600 | -0.65039200 |
| O  | 0.45666000   | 0.56484000  | 0.22079100  |
| Ti | 8.41009200   | -0.37041700 | -3.47751900 |
| O  | 6.55783600   | -0.69337800 | -3.16959700 |
| O  | 9.77724000   | -0.47675800 | -1.97977300 |
| O  | 9.28565500   | -1.85533600 | -4.22009700 |

|    |              |             |             |
|----|--------------|-------------|-------------|
| O  | 6.79069900   | -1.76946300 | -0.12596700 |
| O  | 6.31498700   | 1.84054200  | 0.96456200  |
| O  | 5.58052800   | 0.22836200  | -0.67317900 |
| O  | 5.97140600   | -3.24490000 | -2.02491500 |
| O  | 9.35357000   | 2.58883900  | -1.04542400 |
| O  | 8.62217600   | 1.52883400  | -3.52074700 |
| Ti | 9.69263200   | -0.06254400 | 1.97624000  |
| O  | 11.09098800  | 0.58588700  | 0.70277000  |
| O  | 8.61978400   | 0.34698800  | 0.38773400  |
| O  | 8.66428900   | -3.51694400 | -1.33097800 |
| O  | 5.61469200   | -4.27251300 | 0.60212200  |
| Ti | 6.79891700   | -0.09547400 | 0.92216700  |
| Ti | 6.46960100   | -0.90462100 | 3.87366200  |
| O  | 7.88304200   | -0.49812900 | 2.58355800  |
| O  | 5.43739900   | -0.62757800 | 2.22516400  |
| Ti | 6.94297000   | -3.56994000 | -0.57985400 |
| Ti | 10.03142200  | 0.88018000  | -0.72185800 |
| Ti | 9.67357800   | -2.38031800 | -2.44420700 |
| O  | 6.11547400   | 2.58087000  | -2.16702400 |
| O  | 3.77739600   | -1.54808000 | -1.83638600 |
| Ti | 5.15601300   | 2.09946900  | -0.73481700 |
| O  | 3.31069900   | 1.81796200  | -0.79962000 |
| Ti | 5.63005300   | -1.33649800 | -1.78073600 |
| Ti | 7.95352700   | 2.96839800  | -2.45969300 |
| O  | 8.37640500   | 4.78408900  | -2.19606700 |
| O  | 4.98868300   | 3.83682000  | 0.12678900  |
| O  | 7.57483400   | 4.41689900  | 1.07604400  |
| O  | 4.63163700   | 3.19373400  | 2.87448700  |
| Ti | 5.98004500   | 3.55989100  | 1.57742000  |
| Ti | 8.74839200   | 4.34284100  | -0.40259500 |
| Ti | 2.70763800   | -1.94999100 | -0.41832100 |
| O  | 3.41858100   | -2.90176500 | 2.44047400  |
| O  | 2.30160000   | -3.88965100 | -0.23152400 |
| O  | 2.92801600   | 0.55518900  | 3.43216800  |
| O  | 2.91520800   | -0.63046700 | 0.91469500  |
| O  | 4.68908300   | -1.39124400 | 4.46259000  |
| Ti | 3.75596800   | -1.09209100 | 2.93089100  |
| Ti | 3.82908600   | -3.98904100 | 1.04266000  |
| Ti | 2.32896400   | 1.13842300  | 0.58008200  |
| Ti | 3.01112300   | 2.30018700  | 2.95177800  |
| H  | 0.53441100   | 2.73634200  | 1.80912000  |
| O  | 1.49103600   | 2.56873900  | 1.69820900  |
| H  | 1.47834400   | -4.39636800 | -0.36007900 |
| H  | -14.13471100 | 4.25988200  | -0.08105700 |
| H  | -11.64747200 | 4.28504500  | 0.21584300  |
| H  | -14.27497900 | -4.84296200 | 1.33615500  |
| H  | -11.82811900 | -4.77849700 | 1.86824100  |

PPSQA1@TiO<sub>2</sub>

|   |             |             |             |
|---|-------------|-------------|-------------|
| C | 2.29693300  | -4.07000800 | -0.47865800 |
| C | 3.52762600  | -4.89332200 | -0.46967600 |
| C | 4.30881700  | -3.73829800 | -0.92248300 |
| C | 3.08044000  | -2.92832700 | -1.01046900 |
| C | 0.99421500  | -4.36966400 | -0.05973500 |
| C | 5.66986200  | -3.48257100 | -1.11006100 |
| H | 6.35439900  | -4.29972600 | -0.90389900 |
| C | 6.12635000  | -2.21437900 | -1.46346200 |
| O | 2.84084200  | -1.78834100 | -1.41994000 |
| O | 3.77646000  | -6.06690000 | -0.18249400 |
| H | 5.32628200  | -1.48661700 | -1.54407900 |
| S | 13.52079800 | 2.80450400  | 0.67769300  |

|    |             |             |             |
|----|-------------|-------------|-------------|
| C  | 15.17408900 | 2.68471700  | 1.26966400  |
| C  | 15.62888400 | 1.37529000  | 1.22725800  |
| C  | 14.65894200 | 0.46899400  | 0.74949100  |
| C  | 13.44555300 | 1.04305000  | 0.40487200  |
| N  | 15.81137500 | 3.82135100  | 1.68621400  |
| H  | 16.61696300 | 1.08262600  | 1.55359500  |
| H  | 14.83025900 | -0.59817000 | 0.66459000  |
| H  | 15.26355900 | 4.66998800  | 1.76229800  |
| N  | 17.58794900 | 4.86538600  | 2.89701100  |
| C  | 18.96145000 | 4.84207500  | 2.99392700  |
| C  | 19.42582600 | 3.87989300  | 2.12413400  |
| C  | 18.29826100 | 3.30487000  | 1.46457300  |
| C  | 17.17483100 | 3.94204300  | 1.96820200  |
| H  | 16.97018500 | 5.45200700  | 3.44229800  |
| H  | 19.47829400 | 5.50992900  | 3.66649000  |
| H  | 20.46285100 | 3.61791400  | 1.96417900  |
| H  | 18.30712500 | 2.54524500  | 0.69767100  |
| C  | 12.28234800 | 0.44932900  | -0.07379200 |
| C  | 11.23351300 | -0.02814300 | -0.49665000 |
| C  | 8.92222400  | 0.30365700  | -1.26244100 |
| C  | 7.62968200  | -0.26245800 | -1.60323900 |
| C  | 7.44272500  | -1.70696800 | -1.58444300 |
| C  | 8.62861600  | -2.53846600 | -1.59219800 |
| C  | 9.91608200  | -1.97450800 | -1.22840600 |
| C  | 10.03181900 | -0.56292700 | -0.98078200 |
| C  | 9.07171600  | 1.70002900  | -1.20371800 |
| C  | 8.02559400  | 2.57826400  | -1.49448700 |
| C  | 6.74842000  | 2.02485900  | -1.87015100 |
| C  | 6.59206000  | 0.63344900  | -1.90782600 |
| C  | 8.59232100  | -3.89008800 | -1.96188200 |
| C  | 9.71679900  | -4.72605100 | -1.90901700 |
| C  | 10.97286600 | -4.18116900 | -1.45864000 |
| C  | 11.03593300 | -2.82027800 | -1.14509300 |
| H  | 10.04127000 | 2.11228000  | -0.94137200 |
| H  | 5.62127000  | 0.26043800  | -2.21233100 |
| H  | 7.67374200  | -4.31449100 | -2.34796200 |
| H  | 11.99239500 | -2.39601700 | -0.85858700 |
| C  | 0.69710900  | -5.71881200 | 0.29885900  |
| N  | 0.42165000  | -6.81184100 | 0.59760000  |
| C  | -0.08597200 | -3.42250300 | 0.10493500  |
| O  | -1.24246200 | -3.88655400 | 0.46976800  |
| O  | 0.12135000  | -2.16895100 | -0.06619300 |
| C  | 5.68015400  | 2.91897400  | -2.19270900 |
| C  | 5.86162500  | 4.27735000  | -2.13782200 |
| C  | 7.12475900  | 4.82484600  | -1.76096200 |
| C  | 8.17530000  | 4.00076800  | -1.45028800 |
| C  | 12.11259900 | -5.04263400 | -1.38739800 |
| C  | 12.01505000 | -6.36224100 | -1.74767100 |
| C  | 10.77486100 | -6.89813500 | -2.20594400 |
| C  | 9.65995400  | -6.10254900 | -2.28729800 |
| H  | 4.71916700  | 2.49915900  | -2.47887100 |
| H  | 5.04208800  | 4.94714000  | -2.38156800 |
| H  | 7.24787800  | 5.90337400  | -1.72346100 |
| H  | 9.13949400  | 4.41360600  | -1.16557100 |
| H  | 13.05704700 | -4.62904300 | -1.04376800 |
| H  | 12.88555200 | -7.00910400 | -1.68875400 |
| H  | 10.71839900 | -7.94510200 | -2.48937000 |
| H  | 8.71325500  | -6.50998200 | -2.63226400 |
| Ti | -5.92981500 | 2.23869200  | -3.26630200 |
| O  | -4.41185500 | 1.17731400  | -2.96940300 |
| O  | -7.00658400 | 3.34394800  | -1.91002700 |
| O  | -5.45273700 | 3.87238200  | -3.99067300 |

|    |             |             |             |
|----|-------------|-------------|-------------|
| O  | -4.13366800 | 2.19041800  | 0.11183500  |
| O  | -6.35248700 | -0.72367100 | 1.03501600  |
| O  | -4.61070900 | -0.08985600 | -0.47395800 |
| O  | -2.37508600 | 2.63337100  | -1.65697300 |
| O  | -8.92999000 | 0.83295700  | -1.14929300 |
| O  | -7.39081900 | 1.05362000  | -3.47324000 |
| Ti | -7.52749900 | 2.92739500  | 1.93074100  |
| O  | -8.87483800 | 3.44503000  | 0.57940000  |
| O  | -6.94586800 | 1.91708600  | 0.40393300  |
| O  | -4.12085500 | 4.78832300  | -1.08096500 |
| O  | -1.65406900 | 3.30367700  | 1.00941300  |
| Ti | -5.35149500 | 0.97974200  | 1.03385100  |
| Ti | -4.72423800 | 1.33395800  | 3.99345600  |
| O  | -5.94567200 | 2.04132300  | 2.63695900  |
| O  | -4.09473400 | 0.44174100  | 2.38573900  |
| Ti | -2.96025300 | 3.55281600  | -0.28754900 |
| Ti | -8.24357500 | 2.52690400  | -0.78842200 |
| Ti | -5.52160700 | 4.55582900  | -2.27096100 |
| O  | -6.41378000 | -1.46596900 | -2.11909400 |
| O  | -2.01192000 | -0.11127500 | -1.52499200 |
| Ti | -5.57822000 | -1.74123000 | -0.59197800 |
| O  | -4.07738300 | -2.80709100 | -0.61694700 |
| Ti | -3.43507500 | 1.04121200  | -1.49394200 |
| Ti | -7.96359000 | -0.42237200 | -2.42620200 |
| O  | -9.43872300 | -1.50671500 | -2.27293100 |
| O  | -6.71266800 | -3.08903800 | 0.21853100  |
| O  | -9.01133100 | -1.70487700 | 1.04071000  |
| O  | -6.14854600 | -2.72013700 | 2.99382900  |
| Ti | -7.29639800 | -2.18009800 | 1.58681700  |
| Ti | -9.60339900 | -0.88210700 | -0.51263000 |
| Ti | -0.99655300 | -0.48304700 | -0.06925500 |
| O  | -1.11015500 | 0.64376000  | 2.91825100  |
| O  | 0.26987500  | 0.79483500  | 0.30364400  |
| O  | -3.09006200 | -2.15880900 | 3.68760600  |
| O  | -2.21067200 | -1.32138300 | 1.19297600  |
| O  | -3.22803600 | 0.42147100  | 4.67733600  |
| Ti | -2.61031600 | -0.37317400 | 3.17941900  |
| Ti | -0.74754700 | 1.73121800  | 1.47497800  |
| Ti | -2.97099600 | -2.93959600 | 0.80744000  |
| Ti | -4.39316800 | -3.25459700 | 3.11504200  |
| H  | -2.86719100 | -5.26600400 | 2.12656200  |
| O  | -3.47193300 | -4.53138500 | 1.91907000  |

PPSQA2@TiO<sub>2</sub>

|   |             |             |             |
|---|-------------|-------------|-------------|
| C | 2.13347900  | 3.66134700  | 1.53903300  |
| C | 3.41870000  | 3.93342300  | 2.27963300  |
| C | 4.05662000  | 2.82657000  | 1.58229500  |
| C | 2.84234800  | 2.50719700  | 0.86589200  |
| C | 0.90977900  | 4.26750300  | 1.50159400  |
| C | 5.38216800  | 2.30460900  | 1.58492900  |
| H | 6.06233800  | 2.73331400  | 2.31984800  |
| C | 5.83807500  | 1.35710000  | 0.71604300  |
| O | 2.55310100  | 1.63406300  | 0.02675800  |
| O | 3.74718200  | 4.76509500  | 3.12285500  |
| H | 5.13950800  | 1.00932900  | -0.04024600 |
| S | 14.67325900 | -1.01822700 | -1.42805600 |
| C | 16.22744800 | -1.34628100 | -0.67193700 |
| C | 16.11255100 | -1.40648500 | 0.70840200  |
| C | 14.79784000 | -1.15702900 | 1.16172100  |
| C | 13.87210100 | -0.92079400 | 0.15886500  |
| N | 17.32942200 | -1.49661200 | -1.46954500 |

|    |             |             |             |
|----|-------------|-------------|-------------|
| H  | 16.95195000 | -1.59493900 | 1.36387800  |
| H  | 14.52080400 | -1.14309700 | 2.20991400  |
| H  | 17.21950800 | -1.34105900 | -2.46452200 |
| N  | 19.71533100 | -1.44921000 | -1.66122500 |
| C  | 20.83252000 | -2.03320000 | -1.10794000 |
| C  | 20.40931500 | -2.88401700 | -0.10941800 |
| C  | 18.98404500 | -2.82731500 | -0.06250700 |
| C  | 18.58757200 | -1.93161400 | -1.04249300 |
| H  | 19.71929500 | -0.75369700 | -2.39543300 |
| H  | 21.81966700 | -1.79389300 | -1.47400600 |
| H  | 21.04665600 | -3.49272200 | 0.51762100  |
| H  | 18.32804500 | -3.39193300 | 0.58361500  |
| C  | 12.50957800 | -0.63801300 | 0.25597300  |
| C  | 11.31542300 | -0.37147300 | 0.32883900  |
| C  | 9.19289400  | 0.24532100  | -0.74888800 |
| C  | 7.81251800  | 0.68492800  | -0.63570700 |
| C  | 7.19786900  | 0.83006100  | 0.64871800  |
| C  | 7.93169500  | 0.45957700  | 1.81885500  |
| C  | 9.32588000  | 0.05314500  | 1.71509300  |
| C  | 9.95136500  | -0.02628300 | 0.43178200  |
| C  | 9.77199600  | 0.12240500  | -2.02849300 |
| C  | 9.07037300  | 0.41352000  | -3.19537800 |
| C  | 7.70358500  | 0.87700100  | -3.08998300 |
| C  | 7.12542600  | 1.00876500  | -1.82949200 |
| C  | 7.33381000  | 0.42612400  | 3.10092700  |
| C  | 8.03947300  | 0.08936700  | 4.25304500  |
| C  | 9.44291300  | -0.24873600 | 4.14912000  |
| C  | 10.03677500 | -0.26572200 | 2.89068100  |
| H  | 10.80209100 | -0.21028000 | -2.10740200 |
| H  | 6.10997700  | 1.38382000  | -1.77812600 |
| H  | 6.27918800  | 0.65337300  | 3.19792300  |
| H  | 11.08098000 | -0.54992400 | 2.80895400  |
| C  | 0.63420900  | 5.41206200  | 2.29091400  |
| N  | 0.29809100  | 6.34162300  | 2.91487900  |
| C  | 6.99087900  | 1.19511700  | -4.29386700 |
| C  | 7.58786500  | 1.05847600  | -5.51722300 |
| C  | 8.93897400  | 0.59593100  | -5.62069300 |
| C  | 9.65619400  | 0.28427200  | -4.49795300 |
| C  | 10.16205400 | -0.58197900 | 5.34453200  |
| C  | 9.53231500  | -0.58929900 | 6.55907300  |
| C  | 8.14109100  | -0.26548100 | 6.66149300  |
| C  | 7.41876300  | 0.06059600  | 5.54655000  |
| H  | 5.96497700  | 1.54441200  | -4.21106200 |
| H  | 7.03904800  | 1.30010100  | -6.42279300 |
| H  | 9.39148400  | 0.49541400  | -6.60298900 |
| H  | 10.68230800 | -0.06603200 | -4.57227500 |
| H  | 11.21689500 | -0.83091200 | 5.26338300  |
| H  | 10.08506000 | -0.84341500 | 7.45891600  |
| H  | 7.66336500  | -0.27996900 | 7.63683200  |
| H  | 6.36359600  | 0.30998600  | 5.62102900  |
| P  | -0.35620800 | 3.64800600  | 0.33979200  |
| O  | -1.77488200 | 4.19975800  | 0.80411900  |
| O  | -0.34929100 | 2.11190400  | 0.70447600  |
| O  | -0.01384900 | 4.00841100  | -1.08060500 |
| Ti | -5.22995000 | -3.87116000 | 2.14617600  |
| O  | -3.79345800 | -2.62473300 | 2.35606300  |
| O  | -6.53326400 | -4.54273100 | 0.76097000  |
| O  | -4.24081100 | -5.43409800 | 1.48511900  |
| O  | -3.98869600 | -2.02903000 | -0.96201300 |
| O  | -6.49788600 | 0.69331700  | -0.25702600 |
| O  | -4.58509500 | -0.39937800 | 0.71625800  |
| O  | -1.94198400 | -2.99666200 | 0.15537900  |

|    |             |             |             |
|----|-------------|-------------|-------------|
| O  | -8.78348700 | -1.77446100 | 1.41832800  |
| O  | -6.63343700 | -2.69573300 | 2.62053500  |
| Ti | -7.63871700 | -2.53093100 | -2.18242300 |
| O  | -8.71217100 | -3.59355700 | -0.91790600 |
| O  | -6.81300400 | -2.07479200 | -0.50087400 |
| O  | -3.56513200 | -4.70243000 | -1.43883000 |
| O  | -1.57885600 | -2.08603400 | -2.59950000 |
| Ti | -5.42599600 | -0.78327100 | -1.06018500 |
| Ti | -5.39354300 | 0.04483100  | -3.95383100 |
| O  | -6.28002800 | -1.24840700 | -2.77454300 |
| O  | -4.61096500 | 0.49884700  | -2.24853400 |
| Ti | -2.60143500 | -3.14528500 | -1.45771800 |
| Ti | -7.84795000 | -3.19215600 | 0.55665800  |
| Ti | -4.87016300 | -5.09800300 | -0.12799400 |
| O  | -6.18665800 | 0.20758200  | 2.94826600  |
| O  | -1.89838500 | -0.46846000 | 1.22513200  |
| Ti | -5.57142400 | 1.05469200  | 1.52435900  |
| O  | -4.16320200 | 2.23581400  | 1.77505700  |
| Ti | -3.21799500 | -1.73855600 | 0.93891300  |
| Ti | -7.63019300 | -1.02661100 | 2.87127900  |
| O  | -9.17937500 | -0.05747200 | 3.30868800  |
| O  | -6.89827800 | 2.48790200  | 1.45233500  |
| O  | -9.24164000 | 1.33481800  | 0.31220000  |
| O  | -6.89300100 | 3.38805400  | -1.27219900 |
| Ti | -7.61698500 | 2.11891700  | -0.08870900 |
| Ti | -9.58045400 | -0.04780300 | 1.52425700  |
| Ti | -1.39910700 | 0.70220400  | -0.05929100 |
| O  | -1.66648300 | 1.02420200  | -3.17438300 |
| O  | 0.28055100  | 0.16958300  | -0.94563800 |
| O  | -4.01110000 | 3.50690400  | -2.57079300 |
| O  | -2.74394500 | 1.85557500  | -0.69155200 |
| O  | -4.11561800 | 1.39980200  | -4.46450300 |
| Ti | -3.37432300 | 1.75611000  | -2.87889800 |
| Ti | -0.82910600 | -0.41211900 | -2.45923300 |
| Ti | -3.42480000 | 3.17682200  | 0.42711600  |
| Ti | -5.23331200 | 4.13380900  | -1.38692400 |
| H  | -3.85630400 | 5.80486100  | 0.23668800  |
| O  | -4.31493200 | 4.95035000  | 0.16022200  |
| H  | 1.07437200  | 0.70927600  | -0.70773000 |

PPSQA3@TiO<sub>2</sub>

|   |              |             |             |
|---|--------------|-------------|-------------|
| C | -5.05757200  | 0.83038100  | -0.44090100 |
| C | -5.98613900  | 1.95284200  | -0.26693800 |
| C | -7.13990100  | 1.07670100  | -0.65485400 |
| C | -6.16439400  | -0.05078100 | -0.82080400 |
| C | -8.48580300  | 1.24839700  | -0.80684200 |
| H | -8.88791500  | 2.23811800  | -0.60600100 |
| C | -9.36004300  | 0.18159700  | -1.17707400 |
| O | -6.27315900  | -1.23693800 | -1.14930400 |
| O | -5.88251900  | 3.13827900  | 0.05522400  |
| H | -8.87098200  | -0.78748400 | -1.21866200 |
| S | -17.98423800 | -1.59137000 | 1.47960800  |
| C | -19.30492900 | -0.70905100 | 2.25118600  |
| C | -19.07497500 | 0.64697900  | 2.23168100  |
| C | -17.83835500 | 0.99589900  | 1.61961800  |
| C | -17.09987800 | -0.07303100 | 1.15474700  |
| N | -20.36858700 | -1.42589800 | 2.75807800  |
| H | -19.75702800 | 1.37097200  | 2.65743500  |
| H | -17.48911800 | 2.01830500  | 1.52647100  |
| H | -20.29514600 | -2.43452100 | 2.77630600  |
| N | -22.29501500 | -1.57533900 | 4.16291800  |



|    |              |             |             |
|----|--------------|-------------|-------------|
| C  | -23.44644400 | -0.87673500 | 4.46396600  |
| C  | -23.43282200 | 0.28423400  | 3.72576300  |
| C  | -22.24204000 | 0.28885100  | 2.93562400  |
| C  | -21.56013000 | -0.88153000 | 3.23180200  |
| H  | -22.02047400 | -2.45760600 | 4.57329200  |
| H  | -24.16074000 | -1.26971300 | 5.17161000  |
| H  | -24.19537900 | 1.05153800  | 3.73675700  |
| H  | -21.93581500 | 1.03942700  | 2.22267700  |
| C  | -15.85502000 | -0.11076300 | 0.51578500  |
| C  | -14.76082100 | -0.11587400 | -0.04031400 |
| C  | -12.81590100 | -1.19167200 | -1.12619100 |
| C  | -11.44042100 | -1.08625200 | -1.58191100 |
| C  | -10.72593400 | 0.19243200  | -1.39965800 |
| C  | -11.56528700 | 1.39608000  | -1.37024000 |
| C  | -12.93354800 | 1.28307400  | -0.89946800 |
| C  | -13.49662500 | -0.01323800 | -0.64310000 |
| C  | -13.43433100 | -2.45085200 | -1.19829000 |
| C  | -12.79685800 | -3.58237300 | -1.73201500 |
| C  | -11.45549800 | -3.45663800 | -2.23827100 |
| C  | -10.82105300 | -2.19909800 | -2.14109000 |
| C  | -11.09423400 | 2.63533300  | -1.78570900 |
| C  | -11.85890900 | 3.81849300  | -1.68000500 |
| C  | -13.17896400 | 3.72628200  | -1.11656100 |
| C  | -13.67813900 | 2.46395700  | -0.75503200 |
| H  | -14.45843000 | -2.55220400 | -0.85124500 |
| H  | -9.81116300  | -2.11065800 | -2.53040700 |
| H  | -10.10742200 | 2.70942800  | -2.22918900 |
| H  | -14.69791400 | 2.39700300  | -0.38474100 |
| C  | -3.66067600  | 0.65748200  | -0.31005700 |
| C  | -3.05039000  | -0.61009800 | -0.55317800 |
| C  | -2.80467000  | 1.74106500  | 0.05302200  |
| C  | -1.68616100  | -0.77575100 | -0.45144100 |
| H  | -3.68998600  | -1.44189600 | -0.83008600 |
| C  | -1.43963800  | 1.57213900  | 0.14848800  |
| H  | -3.25561800  | 2.70942200  | 0.24454800  |
| C  | -0.83387000  | 0.31057300  | -0.10652700 |
| H  | -1.24440600  | -1.74557000 | -0.64786200 |
| H  | -0.81029200  | 2.41304600  | 0.41653500  |
| C  | 0.63009200   | 0.12940700  | -0.04199800 |
| C  | -11.36783200 | 5.08461000  | -2.10044800 |
| H  | -10.36938700 | 5.13957500  | -2.52840100 |
| C  | -13.94314300 | 4.92640200  | -0.98853600 |
| C  | -13.43368200 | 6.13625700  | -1.39840500 |
| H  | -14.03017200 | 7.03859100  | -1.29321300 |
| C  | -12.13245500 | 6.22167800  | -1.96348800 |
| H  | -11.74592700 | 7.18472900  | -2.28392600 |
| H  | -14.94173500 | 4.86489900  | -0.56255700 |
| C  | -10.81948200 | -4.59235900 | -2.81174400 |
| C  | -13.43515500 | -4.85748200 | -1.82068300 |
| H  | -14.44874800 | -4.95997900 | -1.44014800 |
| C  | -12.78837500 | -5.93549800 | -2.37734800 |
| H  | -13.29076300 | -6.89748900 | -2.43592400 |
| C  | -11.46538900 | -5.80658100 | -2.88093900 |
| H  | -10.96911700 | -6.66806300 | -3.31828500 |
| H  | -9.80631700  | -4.48395600 | -3.19217800 |
| O  | 1.41898900   | 1.14809900  | 0.25646800  |
| O  | 1.16332600   | -1.05018100 | -0.28318300 |
| Ti | 8.58171200   | 1.32453800  | 3.42288400  |
| O  | 6.72054200   | 1.34137100  | 3.13290400  |
| O  | 10.03020200  | 1.26931200  | 2.11006000  |
| O  | 9.19322400   | 3.01774400  | 3.78444500  |
| O  | 7.23962000   | 1.81319200  | -0.04986700 |

|    |             |             |             |
|----|-------------|-------------|-------------|
| O  | 7.07592700  | -1.92313100 | -0.27673000 |
| O  | 6.11874700  | -0.05906900 | 0.74724400  |
| O  | 6.15286600  | 3.57527600  | 1.35242800  |
| O  | 9.87137900  | -1.93669200 | 1.92573500  |
| O  | 9.01598700  | -0.40689100 | 4.08314200  |
| Ti | 10.43247500 | -0.20819400 | -1.44659100 |
| O  | 11.71841900 | -0.23000900 | -0.04082200 |
| O  | 9.23811200  | -0.16507400 | 0.06607800  |
| O  | 8.88383700  | 4.08129100  | 0.63440200  |
| O  | 6.18261400  | 4.05394300  | -1.49381400 |
| Ti | 7.46255600  | -0.03219500 | -0.75139100 |
| Ti | 7.36115900  | 0.03788200  | -3.79697200 |
| O  | 8.67950000  | 0.04308000  | -2.31210600 |
| O  | 6.24841900  | 0.08092900  | -2.20623200 |
| Ti | 7.25157000  | 3.62359200  | -0.01961900 |
| Ti | 10.59545000 | -0.32629000 | 1.29315100  |
| Ti | 9.80865000  | 3.20996500  | 2.06767200  |
| O  | 6.56190500  | -1.79035300 | 2.93040400  |
| O  | 4.11197800  | 1.69587600  | 1.55412400  |
| Ti | 5.80910100  | -1.88275600 | 1.33360700  |
| O  | 3.94122000  | -1.67459700 | 1.32085800  |
| Ti | 5.98949100  | 1.69756700  | 1.56510900  |
| Ti | 8.41313700  | -1.99339800 | 3.22634100  |
| O  | 8.84252200  | -3.77424900 | 3.39170700  |
| O  | 5.79213900  | -3.72458200 | 0.88051200  |
| O  | 8.45942900  | -4.41543900 | 0.12526700  |
| O  | 5.80730700  | -3.86001800 | -2.00027900 |
| Ti | 6.90167500  | -3.71559400 | -0.48272000 |
| Ti | 9.45386200  | -3.82430200 | 1.65346400  |
| Ti | 3.29250500  | 1.70787400  | -0.01522200 |
| O  | 4.10638900  | 2.05563000  | -3.13386700 |
| O  | 2.99986000  | 3.60016100  | -0.68495600 |
| O  | 3.91560600  | -1.48492900 | -3.36928600 |
| O  | 3.75464500  | 0.17722600  | -1.01932600 |
| O  | 5.68175400  | 0.32124800  | -4.54779700 |
| Ti | 4.63366400  | 0.23675600  | -3.08701000 |
| Ti | 4.53432900  | 3.25673200  | -1.88648400 |
| Ti | 3.14488400  | -1.40044700 | -0.24092300 |
| Ti | 4.26248000  | -2.86330500 | -2.27836900 |
| H  | 1.76601100  | -3.15490100 | -1.55159500 |
| O  | 2.66274500  | -3.15081100 | -1.16065400 |
| H  | 2.03215300  | 3.80373900  | -0.68628600 |
